# Supplementary material
Source: Royal Society of Chemistry journal article supplement (doi:10.1039/d6em00068a)
Supplement: d6em00068a1.xlsx [file d6em00068a1.xlsx]

## Sheet: README
Vrchlice and Sous germanium speciation data
Monthly sampling from May 2023 to May 2024
File supplementing the article: Seasonal speciation of dissolved germanium in Bohemian reservoirs with contrasting chemistry and trophic status
Authors:	Tomáš Matoušek (matousek@biomed.cas.cz)
	Michaela Prokopová (prokopova@ih.cas.cz)
	Martin Pivokonský (pivo@ih.cas.cz)
	Montserrat Filella (montserrat.filella@unige.ch)

## Sheet: Methods
Parameter	Abbreviation	Units	Analytical methods	NOTES
inorganic Ge	iGe	ng/L	HG-CT-ICP-MS/MS
methylgermanium	MGe	ng/L	HG-CT-ICP-MS/MS
dimethylgermanium	DMGe	ng/L	HG-CT-ICP-MS/MS
pH			combined probe multimeter HI 98494	Range: 0-13 pH, accuracy ±1%
Redox potential (mV)	ORP	mV	combined probe multimeter HI 98494	Range: ±2000 mV pH, accuracy ±1.0 mV
dissolved oxygen	%DO		combined probe multimeter HI 98494	Range: 0-200%, accuracy ±0.1%
dissolved oxygen	DO	mg/L	combined probe multimeter HI 98494	Range: 0-20 mg/L, accuracy ±0.01 mg/L
Conductivity		mS/cm	combined probe multimeter HI 98494	Range: 0-200 mS/cm, accuracy ±1 µS/cm
Temperature		°C	combined probe multimeter HI 98494	Range: -5-50 °C, accuracy ±0.15 °C
Alkalinity		mmol/L	Alkalinity was assessed through titration using 0.1 M HCl, and methyl orange as an indicator to reach the pH value of 4.5.
Chemical oxygen demand	CODMn	mg/L	Chemical oxygen demand by potassium permanganate was determined according to ISO 8467 (1993).
total organic carbon	TOC	mg/L	TOC-L analyser (Shimadzu, Japan)	Average of two measurements, samples acidified 0.4 ml conc. HCl per 20ml due to high inorganic C
dissolved organic carbon	DOC	mg/L	TOC-L analyser (Shimadzu, Japan)	Average of two measurements, samples acidified 0.4 ml conc. HCl per 20ml due to high inorganic C
total nitrogen	TN	mg/L	TOC-L analyser (Shimadzu, Japan)	Average of two measurements, samples acidified 0.4 ml conc. HCl per 20ml due to high inorganic C
NO2-N (mg/L)		mg/L	DR1900 spectrophotometer (HACH, Germany)	Nitrites. Range 2-250 mg/L; blank + reagents = 2 mg/L NO2
NO3-N (mg/L)		mg/L	DR1900 spectrophotometer (HACH, Germany)	Nitrates. Range 0.1-10 mg/L NO3-N
NH3-N (mg/L)		mg/L	DR1900 spectrophotometer (HACH, Germany)	Ammonia nitrogen. Range 0.01-0.5 mg/L NH3-N
SO42- (mg/L)		mg/L	DR1900 spectrophotometer (HACH, Germany)	Sulfates. Range 2-70 mg/L SO42-
PO43- (mg/L)		mg/L	DR1900 spectrophotometer (HACH, Germany)	Reactive phospohorus (orthophosphates) Range 0.02-2.5 mg/L PO43-
Cl- (mg/L)		mg/L	DR1900 spectrophotometer (HACH, Germany)	Chlorides. Range 0.1-25 mg/L Cl-, 2 times diluted
Color455 nm (mg/L PtCo)			DR1900 spectrophotometer (HACH, Germany)	Color. Range 3-200 units PtCo
Al396.152 nm (mg/L)			ICP-OES, 5110 Series (Agilent)	filtered 0.45 µm, 2 times diluted
B208.956 nm (mg/L)			ICP-OES, 5110 Series (Agilent)	filtered 0.45 µm, 2 times diluted
Ba455.403 nm (mg/L)			ICP-OES, 5110 Series (Agilent)	filtered 0.45 µm, 10 times diluted
Ca422.673 nm (mg/L)			ICP-OES, 5110 Series (Agilent)	filtered 0.45 µm, 2 times diluted
Fe238.204 nm (mg/L)			ICP-OES, 5110 Series (Agilent)	filtered 0.45 µm, 2 times diluted
K766.491 nm (mg/L)			ICP-OES, 5110 Series (Agilent)	filtered 0.45 µm, 2 times diluted
Mg279.553 nm (mg/L)			ICP-OES, 5110 Series (Agilent)	filtered 0.45 µm, 2 times diluted
Mn257.610 nm (mg/L)			ICP-OES, 5110 Series (Agilent)	filtered 0.45 µm, 2 times diluted
Na589.592 nm (mg/L)			ICP-OES, 5110 Series (Agilent)	filtered 0.45 µm, 2 times diluted
Ti336.122 nm (mg/L)			ICP-OES, 5110 Series (Agilent)	filtered 0.45 µm, 2 times diluted
Zn213.857 nm (mg/L)			ICP-OES, 5110 Series (Agilent)	filtered 0.45 µm, 2 times diluted
Si251.432 nm (mg/L)			ICP-OES, 5110 Series (Agilent)	filtered 0.45 µm, 2 times diluted
Turbidity (NTU)			laser nephelometer TU5200 (HACH, Germany)
Abs210 nm			UV-VIS Spectrophotometer 8453 (Agilent)	filtered 0.45 µm
Abs254 nm			UV-VIS Spectrophotometer 8453 (Agilent)	filtered 0.45 µm
Abs280 nm			UV-VIS Spectrophotometer 8453 (Agilent)	filtered 0.45 µm
Abs365 nm			UV-VIS Spectrophotometer 8453 (Agilent)	filtered 0.45 µm
Abs436 nm			UV-VIS Spectrophotometer 8453 (Agilent)	filtered 0.45 µm
Abs520 nm			UV-VIS Spectrophotometer 8453 (Agilent)	filtered 0.45 µm
Abs560 nm			UV-VIS Spectrophotometer 8453 (Agilent)	filtered 0.45 µm
Abs620 nm			UV-VIS Spectrophotometer 8453 (Agilent)	filtered 0.45 µm
Abs680 nm			UV-VIS Spectrophotometer 8453 (Agilent)	filtered 0.45 µm
Abs700 nm			UV-VIS Spectrophotometer 8453 (Agilent)	filtered 0.45 µm
Abs720 nm			UV-VIS Spectrophotometer 8453 (Agilent)	filtered 0.45 µm
Abs780 nm			UV-VIS Spectrophotometer 8453 (Agilent)	filtered 0.45 µm
SUVA [L/(mg.m)]
Abs210 nm			UV-VIS Spectrophotometer 8453 (Agilent)	unfiltered
Abs254 nm			UV-VIS Spectrophotometer 8453 (Agilent)	unfiltered
Abs280 nm			UV-VIS Spectrophotometer 8453 (Agilent)	unfiltered
Abs365 nm			UV-VIS Spectrophotometer 8453 (Agilent)	unfiltered
Abs436 nm			UV-VIS Spectrophotometer 8453 (Agilent)	unfiltered
Abs520 nm			UV-VIS Spectrophotometer 8453 (Agilent)	unfiltered
Abs560 nm			UV-VIS Spectrophotometer 8453 (Agilent)	unfiltered
Abs620 nm			UV-VIS Spectrophotometer 8453 (Agilent)	unfiltered
Abs680 nm			UV-VIS Spectrophotometer 8453 (Agilent)	unfiltered
Abs700 nm			UV-VIS Spectrophotometer 8453 (Agilent)	unfiltered
Abs720 nm			UV-VIS Spectrophotometer 8453 (Agilent)	unfiltered
Abs780 nm			UV-VIS Spectrophotometer 8453 (Agilent)	unfiltered

## Sheet: Sampling-analysis dates
	Vrchlice									Souš
	49.9270392N, 15.2270806E									50.7911378N, 15.3183094E
	Sampling Date	Time	Weather	Water level (m AMSL)	Volume (106 m3)	Non-Cys	Days after sampling	Cys	Days after sampling	Sampling Date	Time	Weather	Water level (m AMSL)	Volume (106 m3)	Non-Cys	Days after sampling	Cys	Days after sampling
May-23	2023-05-09 10:00:00	10:00:00	cloudy	323.65	8.18	2023-05-10 10:00:00	1	2023-05-12	2.58333	2023-05-16 10:00:00	10:00:00	rain	766.01	5.05	2023-05-17	0.583333	2023-05-22	5.58333
Jun-23	2023-06-06 10:00:00	10:00:00	cloudy, drizzle	323.43	7.98	2023-06-07	0.583333	2023-06-16	9.58333	2023-06-06 13:00:00	13:00:00	cloudy, drizzle	765.72	4.51	2023-06-07	1.45833	2023-06-16	9.45833
Jul-23	2023-07-11 10:00:00	10:00:00	sunny	322.96	7.55	2023-07-14	2.58333	2023-07-17	5.58333	2023-07-13 13:00:00	13:00:00	cloudy, windy	764.99	4.05	2023-07-14	1.45833	2023-07-17	3.45833
Aug-23	2023-08-15 10:00:00	10:00:00	sunny, windy	322.47	7.13	2023-08-16	0.583333	2023-08-21	5.58333	2023-08-15 13:00:00	13:00:00	sunny, no wind	765.1	4.11	2023-08-16	1.45833	2023-08-21	5.45833
Sep-23	2023-09-12 09:00:00	09:00:00	sunny	322.1	6.78	2023-09-15	2.625	2023-09-18	5.625	2023-09-12 12:00:00	12:00:00	sunny, no wind	764.73	3.84	2023-09-15	3.5	2023-09-18	5.5
Oct-23	2023-10-09 09:00:00	09:00:00	rain	321.67	6.47	2023-10-10	0.625	2023-10-17	7.625	2023-10-09 13:00:00	13:00:00	rain	764.1	3.51	2023-10-10	1.45833	2023-10-17	7.45833
Nov-23	2023-11-14 09:00:00	09:00:00	windy	321.37	6.24	2023-11-16	1.625	2023-12-01	16.625	2023-11-14 13:00:00	13:00:00	cloudy	765.39	4.32	2023-11-16	2.45833	2023-12-01	16.4583
Dec-23	2023-12-12 09:00:00	09:00:00	windy	321.61	6.42	2023-12-13	0.625	2023-12-20	7.625
Jan-24
Feb-24	2024-02-06 09:00:00	09:00:00	windy	323.64	8.17	2024-02-07	0.625	2024-02-09	2.625
Mar-24	2024-03-12 09:00:00	09:00:00	windy	323.68	8.21	2024-03-15	2.625	2024-03-18	5.625
Apr-24	2024-04-09 09:00:00	09:00:00	sunny	323.61	8.14	2024-04-12	2.625	2024-04-15	5.625	2024-04-09 13:00:00	13:00:00	sunny, windy	765.91	4.64	2024-04-11	2.45833	2024-04-15	5.45833
May-24	2024-05-14 09:00:00	09:00:00	sunny	323.51	8.14	2024-05-18	3.625	2024-05-20	5.625	2024-05-14 13:00:00	13:00:00	sunny, windy	765.86	4.6	2024-05-17	3.45833	2024-05-22	7.45833

## Sheet: Vrchlice data
			Germanium speciation data (IAC)				Ancillary data (IH)
			Values below LOQ (relative error up to 30%) are in red
			Values below LOD are in Italics
			Values highlighted in grey are influenced by bottom sediments disturbed during sampling and are therefore unreliable
	Sampling date	Depth (m)	iGe (ng/L)	MGe (ng/L)	DMGe (ng/L)	pH (-)	ORP (mV)	%DO	DO (mg/L)	Conductivity (µS/cm)	Temperature (°C)	Alkalinity (mmol/L)	CODMn (mg/L)	TOC (mg/L)	DOC (mg/L)	TN (mg/L)	NO2-N (mg/L)	NO3-N (mg/L)	NH3-N (mg/L)	SO42- (mg/L)	PO43- (mg/L)	Cl- (mg/L)	Color455 nm (PtCo)	Al396.152 nm (mg/L)	B208.956 nm (mg/L)	Ba455.403 nm (mg/L)	Ca422.673 nm (mg/L)	Fe238.204 nm (mg/L)	K766.491 nm (mg/L)	Mg279.553 nm (mg/L)	Mn257.610 nm (mg/L)	Na589.592 nm (mg/L)	Ti336.122 nm (mg/L)	Zn213.857 nm (mg/L)	Si251.432 nm (mg/L)	Turbidity (NTU)	Abs210 nm	Abs254 nm	Abs280 nm	Abs365 nm	Abs436 nm	Abs520 nm	Abs560 nm	Abs620 nm	Abs680 nm	Abs700 nm	Abs720 nm	Abs780 nm	SUVA [L/(mg.m)]
Vrchlice	2023-05-09	0	1.91378	0.323293	0.0878713	9.53	243.1	99.2	9.44	384	14.89	1.5		11.14	9.7195	7.076	3	2.8	0.02	48	0.04	31.2	18	0.0084	0.0144	0.0332	38.993	0.0061	4.7466	9.0913	0.0023	9.4885	-0.0007	0.0038	2.059	24.2121	2.7721	0.17201	0.12338	0.025645	0.0079641	0.0025721							1.76974
Vrchlice	2023-05-09	2.5	1.68259	0.320527	0.116513	9.52	247.1	99.4	9.51	383	14.63	1.48		11.385	9.42	7.0935	2	3	0.01	48	0.02	33.6	22	0.0111	0.0142	0.0329	38.7704	0.0058	4.651	9.0115	0.0031	9.2341	-0.0009	0.0025	2.039	24.8182	2.7676	0.17208	0.12357	0.026604	0.0084453	0.0029941							1.82675
Vrchlice	2023-05-09	5	2.19699	0.329917	0.095596	8.68	288	74.6	7.96	401	9.8	1.53		10.34	8.883	6.7395	2	3.3	0.06	48	0.04	37.8	19	0.0061	0.015	0.032	39.003	0.0093	4.7401	9.0021	0.0022	9.3611	-0.0008	0.0019	3.079	21.4848	2.7354	0.16087	0.11511	0.024401	0.0076575	0.002914							1.81099
Vrchlice	2023-05-09	7.5	2.61702	0.347691	0.0930358	8.4	294.9	55.2	6.11	403	8.29	1.49		10.11	8.7815	6.3675	_	3.8	0.12	46	0.04	35.6	15	0.0091	0.0145	0.0329	40.0369	0.0122	4.8315	9.0759	0.0019	9.5793	-0.0005	0.0048	3.418	23	2.6942	0.15298	0.10919	0.022906	0.0072017	0.0028992							1.74207
Vrchlice	2023-05-09	10	2.81715	0.323151	0.0901018	8.26	296.8	52.8	5.92	404	7.74	1.56		9.743	8.981	6.1375	_	3.6	0.13	47	0.03	37	17	0.0106	0.01425	0.03245	39.362	0.01905	4.78215	8.9706	0.0026	9.52385	-0.00035	0.0035	3.515	13.9091	2.6848	0.15047	0.10704	0.021818	0.0061889	0.001637							1.67543
Vrchlice	2023-05-09	15	2.65541	0.329594	0.106204	8.11	297	54.5	6.23	414	6.97	1.58		9.196	8.852	5.4905	_	3.1	0.12	49	0.04	37.8	13	0.0082	0.0132	0.0312	40.5122	0.0395	4.8459	9.1507	0.0068	9.7319	-0.0007	0.008	3.526	6.63636	2.577	0.13125	0.092152	0.017259	0.0046482	0.0011535							1.48272
Vrchlice	2023-05-09	20	2.67482	0.31713	0.0913521	8.02	297.3	54.7	6.3	415	6.71	1.62		8.9715	8.8815	5.4435	_	2.4	0.13	50	0.05	32.8	13	0.0111	0.0126	0.0322	41.6223	0.0121	5.0262	9.4307	0.0132	10.006	-0.0006	0.0039	3.656	6.93939	2.5673	0.13063	0.091644	0.017097	0.0045114	0.0011163							1.47081
Vrchlice	2023-05-09	30	2.92533	0.323692	0.0942104	7.83	300.2	40.2	4.65	419	6.54	1.75		10.065	9.138	4.993	2	2.6	0.47	50	0.06	37.6	13	0.0073	0.0136	0.0344	42.5575	0.0177	5.0267	9.394	0.3297	9.9476	-0.0007	0.0087	3.895	32.3939	2.362	0.13358	0.093943	0.017929	0.0049267	0.001338							1.46181
Vrchlice	2023-06-06	0	0.274693	0.368898	<0.07	8.65	242	62.8	5.37	403	19.6	1.56		9.5655	8.97	6.7595	4	2.4	0.04	48	0.04	22.3	11	0.0221	0.0132	0.0342	32.9773	0.0184	4.8772	9.6575	0.0037	8.795	-0.0007	0.0087	0.185	9.66667	2.7702	0.15874	0.11135	0.020735	0.0065517	0.0025716							1.76968
Vrchlice	2023-06-06	2.5	0.294119	0.321301	<0.07	8.69	242.1	63	5.41	404	19.36	1.58		9.814	9.038	6.649	_	2.5	0.05	49.5	0.02	24.1	11	0.0228	0.0152	0.0335	32.2354	0.0185	4.7911	9.5209	0.0035	8.6394	-0.0006	0.0045	0.132	8.75758	2.7628	0.15977	0.11224	0.021743	0.0072722	0.0031772							1.76776
Vrchlice	2023-06-06	5	1.32392	0.318382	<0.07	7.69	279.9	35.6	3.54	406	12.41	1.59		9.4905	8.5665	6.5325	_	2.7	0.1	48	0.07	27.8	18	0.0132	0.0148	0.0342	32.676	0.0115	4.4236	9.3135	0.0029	8.6449	-0.0006	0.0061	1.565	12.0909	2.7535	0.16234	0.11632	0.025524	0.0087376	0.0038428							1.89506
Vrchlice	2023-06-06	7.5	2.74503	0.304626	<0.07	7.52	283.2	13.9	1.51	402	8.66	1.55		8.941	8.1685	6.252	_	3.1	0.05	47	0.1	27	15	0.0131	0.014	0.0331	32.2004	0.0147	4.8964	9.3085	0.0036	8.8153	-0.0005	0.0117	3.525	10.5758	2.7229	0.15462	0.11068	0.024681	0.0086007	0.0042934							1.89288
Vrchlice	2023-06-06	10				7.48	281.7	25.3	2.81	403	7.79	1.6		8.9735	8.7205	6.0945	_	3.3	0.03	50	0.04	27	15	0.0302	0.012	0.0312	32.2804	0.0264	4.8707	9.3176	0.0024	8.8393	0.0003	0.0045	3.711	11.1818	2.7295	0.15343	0.10921	0.022876	0.005929	0.0015173							1.75942
Vrchlice	2023-06-06	15	2.72058	0.4106	<0.07	7.49	279.8	35.5	4.01	414	7.11	1.66		8.362	8.422	5.2605	_	3.4	0.03	48	0.09	30	10	0.0129	0.0145	0.03	33.0935	0.0115	4.6226	9.6992	0.0011	9.026	-0.0006	0.0112	3.661	8.75758	2.5748	0.13097	0.091956	0.017607	0.0044794	0.0010962							1.55509
Vrchlice	2023-06-06	20	2.77819	0.30596	<0.07	7.48	279	36.4	4.15	415	6.74	1.64		8.181	7.9575	5.13	_	2.8	0.06	51	0.05	30.4	10	0.0106	0.0126	0.0298	32.7248	0.0077	4.9562	9.5113	0.0011	9.0056	-0.0008	0.0134	3.718	8.75758	2.5612	0.12917	0.090428	0.01709	0.0043483	0.0010581							1.62325
Vrchlice	2023-06-06	30	5.00782	0.335485	<0.07	7.34	279.9	4.7	0.53	424	6.57	2.06		10.395	8.0725	4.4335	3	2.1	0.46	45	0.05	30.2	13	0.0059	0.013	0.0321	34.09	0.0314	4.7451	10.0843	0.9183	9.2604	-0.0008	0.0072	4.466	47.8485	1.8861	0.13315	0.093268	0.018087	0.0047698	0.0013232							1.64943
Vrchlice	2023-07-11	0	1.17399	0.37104	0.0814388	9.08	227.3	138.8	11.12	390	24.1	1.49		10.965	9.2625	7.8665	0.058	3	0.05	51	0.05	29	12	0.01175	0.01985	0.0321	33.4279	0.01915	4.66365	9.6069	0.00105	10.5996	-0.00045	0.00225	0.495	18.2	2.5972	0.14378	0.097801	0.01628	0.0056167	0.0026569	0.0019608	0.0015292	0.0010939	0.00096369	0.00089169	0.00077295	1.55228
Vrchlice	2023-07-11	2.5	1.12229	0.368769	0.0789054	9.08	230.5	139	11.16	390	23.97	1.44		10.845	9.178	7.813	0.051	2.9	0.32	52	0.03	32.6	9	0.01235	0.0184	0.0323	33.0441	0.0174	4.6768	9.6471	0.00095	10.5845	-0.00045	0.0052	0.497	17.8	2.5932	0.14364	0.097397	0.017014	0.0061917	0.0032363	0.0024595	0.0019779	0.0015616	0.0013914	0.0013423	0.0012469	1.56505
Vrchlice	2023-07-11	5	1.50218	0.354792	0.0914256	8.5	259	93.2	8.52	409	17.41	1.66		12.46	8.5985	8.519	0.052	3.5	0.03	49	0.03	32.8	19	0.0086	0.0179	0.0347	35.6467	0.0173	4.61395	9.3407	0.0006	10.4418	-0.00045	0.005	1.0965	39.4	2.6511	0.15247	0.10654	0.020442	0.0060096	0.0027995	0.0020747	0.0013542	0.0010552	0.00094986	0.0008359	0.00073957	1.77322
Vrchlice	2023-07-11	7.5	2.51703	0.367736	0.0778607	7.49	268.7	4.1	0.44	410	9.77	1.73		10.265	8.3875	8.3335	0.159	3.5	0.09	48	0.04	33.2	22	0.0076	0.0174	0.03525	37.1291	0.01825	4.7201	9.17895	0.07265	10.5085	-0.0006	0.0048	2.7145	30.3	2.658	0.16089	0.11492	0.02648	0.010188	0.0054622	0.0043478	0.0032167	0.0026774	0.0024004	0.0021853	0.0017676	1.91821
Vrchlice	2023-07-11	10	3.19135	0.308862	0.0677927	7.44	265.8	3.4	0.38	404	8.24	1.64		8.455	7.7545	8.1615	0.08	3	0.05	47	0.05	33	17	0.00775	0.0171	0.0328	36.2631	0.021	4.7344	9.0981	0.05515	10.5213	-0.00045	0.00605	3.8105	13.9	2.6942	0.15265	0.10819	0.022107	0.0062337	0.0021148	0.0013385	0.00069141	0.00034618	0.00029898	0.00019312	7.8201e-05	1.96853
Vrchlice	2023-07-11	15	3.33569	0.332732	0.076303	7.41	270.1	28.3	3.26	412	7.22	1.69		7.828	7.4255	7.5695	0.006	2.8	0.01	50	0.04	34.4	14	0.00875	0.01545	0.03	35.4897	0.02275	4.75885	9.0646	0.00465	10.6151	-0.00035	0.00835	3.897	8.45	2.6007	0.13831	0.097476	0.01923	0.0056863	0.0018482	0.0010915	0.00050592	0.00028276	0.00021791	8.5831e-05	3.1471e-05	1.86264
Vrchlice	2023-07-11	20	3.44814	0.30757	0.0693733	7.37	272.3	24.5	2.85	416	6.81	1.68		7.497	7.297	7.0115	0.014	3.4	0.06	48	0.07	36	12	0.00865	0.01415	0.0306	36.0966	0.02425	4.846	9.3543	0.04785	10.9792	-0.0005	0.0082	4.014	10.9	2.481	0.12742	0.088251	0.014432	0.002821	0.00097895	0.00031137	-0.00016546	-0.00024796	-0.00027323	-0.00043249	-0.00052357	1.7462
Vrchlice	2023-07-11	30	17.6	0.353707	0.0695617	7.14	-138.9	2.7	0.31	551	6.65	3.2		11.575	8.9205	8.4955	0.034	1.7	3.9	37	0.56	39	88	0.0065	0.01675	0.0592	40.2991	4.12845	5.2341	9.9851	6.0427	10.9558	-0.00045	0.00735	6.4635	100.9	1.4159	0.25337	0.19347	0.057633	0.017558	0.0064383	0.0042062	0.0024362	0.0014119	0.0011411	0.00099039	0.00056219	2.84031
Vrchlice	2023-08-15	0	1.5289	0.35126	0.107443	8.95	218.4	115.9	9.36	375	23.65	1.31		12.64	10.86	5.84	0.037	0.7	0.09	48	0.04	35.6	4	0.01625	0.01405	0.0309	31.4762	0.06505	5.0394	9.69215	0.0022	10.3273	-0.00105	0.0088	0.745	6.19355	2.3443	0.1337	0.08999	0.01544	0.0058498	0.0028067	0.0024037	0.0016298	0.001215	0.0011225	0.0010266	0.00078917	1.23112
Vrchlice	2023-08-15	2.5	1.45197	0.347785	0.1163	9.13	218.2	120.5	10.4	371	20.22	1.31		12.74	10.315	5.9075	0.037	0.6	0.05	47	0.03	35.4	4	0.0095	0.01475	0.03075	31.3163	0.0053	4.9002	9.5969	0.001	10.2372	-0.00105	0.00055	0.709	8.77419	2.3451	0.13633	0.09222	0.016545	0.0064054	0.0027733	0.0022831	0.0015936	0.0012889	0.0011249	0.0010104	0.00078773	1.32167
Vrchlice	2023-08-15	5	1.86698	0.345282	0.126262	8.69	231.6	84.7	7.54	379	18.72	1.38		12.84	11.7	6.0935	0.038	1	0.09	46	0.05	25.8	5	0.0098	0.01765	0.03055	31.9663	0.0052	4.9654	9.60675	0.0006	10.244	-0.00115	0.00075	0.9085	9.09677	2.3295	0.1353	0.092103	0.016785	0.0063572	0.0029569	0.0022898	0.0016479	0.0013566	0.0012803	0.0011854	0.0010414	1.15641
Vrchlice	2023-08-15	7.5	2.85823	0.315505	0.108343	7.81	257.4	3.4	0.35	438	11.98	1.99		11.615	10.635	6.8595	0.168	1.2	0.27	45	0.04	26.6	18	0.0075	0.0143	0.03495	40.3513	0.0052	4.94675	9.29825	0.012	10.1634	-0.0011	0.0011	2.774	18.7742	2.5048	0.15657	0.11179	0.027063	0.011337	0.005785	0.0048246	0.0036864	0.0030217	0.0028691	0.0027437	0.0024295	1.47221
Vrchlice	2023-08-15	10	3.6369	0.315928	0.110507	7.77	259	2.8	0.31	435	9.2	2.08		11.59	9.665	6.9995	0.278	1.5	0.2	46	0.03	27	14	0.00315	0.01445	0.0382	40.2627	0.00995	4.9845	9.18735	0.2875	10.1485	-0.0011	0.00285	3.7565	30.7097	2.53	0.1624	0.11845	0.025267	0.0083108	0.0034046	0.0026054	0.0017805	0.0012774	0.0012631	0.0011516	0.00088978	1.68029
Vrchlice	2023-08-15	15	3.92387	0.316127	0.109272	7.64	260.1	2.3	0.27	418	7.47	1.8		10.55	9.5445	7.075	0.046	0.8	0.17	45	0.04	28	16	0.00225	0.0131	0.03235	37.568	0.0336	4.99775	9.2744	0.14945	10.2856	-0.0011	0.0014	4.104	13.2903	2.5158	0.14588	0.10405	0.02197	0.0072031	0.002924	0.0021329	0.0015006	0.0011191	0.0010095	0.00098228	0.00078487	1.52842
Vrchlice	2023-08-15	20	4.55964	0.308911	0.116942	7.5	261.9	2.2	0.25	422	6.93	1.86		10.25	9.647	6.473	0.07	0.9	0.36	46	0.05	28.6	8	0.00345	0.0124	0.03045	37.3154	0.0098	5.08065	9.4832	0.35755	10.4227	-0.00105	0.00155	4.3215	8.12903	2.3128	0.13979	0.10034	0.020251	0.0070605	0.0031018	0.0025392	0.0018067	0.0015106	0.0014744	0.0014272	0.0012293	1.44905
Vrchlice	2023-08-15	29	10.673	0.324027	0.105803	-	-	2.2	-	-	-	2.31		11.18	9.946	6.2475	0.049	0.6	1.8	41	0.05	28	9	0.00405	0.01325	0.03065	38.9641	0.2275	5.24335	9.7685	1.5066	10.4588	-0.001	0.0009	5.3	20.0645	1.7553	0.15227	0.10973	0.023807	0.0079985	0.0037889	0.0029807	0.0022645	0.001822	0.0017748	0.0017276	0.0014873	1.53097
Vrchlice	2023-09-12	0	1.69138	0.348444	0.10681	9.13	136.3	129	10.68	365	21.95	1.4		10.84	10.14	5.752	0.035	1.1	0.01	47	0.03	30.6	11	0.01245	-0.00905	0.03065	30.1527	0.0143	5.08245	9.39905	0.00215	9.56805	-0.0009	0.0129	0.799	4.581	2.0802	0.12823	0.084806	0.014309	0.0046844	0.0017886	0.0013747	0.00069046	0.00032854	0.00034475	0.00022888	0.00019932	1.2646
Vrchlice	2023-09-12	2.5	1.61883	0.353484	0.112587	9.12	143.8	126	10.5	366	21.64	1.38		10.7	9.991	5.838	0.035	1.3	0.01	49	0.03	31	16	0.011	-0.0092	0.0306	30.4537	0.0097	4.8121	9.50495	0.0011	9.61985	-0.0009	0.0032	0.7905	4.581	2.0778	0.1266	0.083676	0.014188	0.0049572	0.0022373	0.0016437	0.0010767	0.00065136	0.0006876	0.00060511	0.00063658	1.26714
Vrchlice	2023-09-12	5	1.80932	0.349038	0.1	8.47	170.9	73.6	6.35	377	19.88	1.37		10.66	9.651	6.0335	0.037	1.3	0.05	48	0.02	27.4	18	0.00995	-0.00795	0.03175	31.3199	0.01085	4.8787	9.58995	0.0008	9.72535	-0.00095	0.00195	0.9125	5.548	2.0935	0.12678	0.084863	0.014879	0.0052166	0.0020051	0.0015645	0.00099087	0.00069284	0.00063658	0.00062561	0.00058889	1.31365
Vrchlice	2023-09-12	7.5	2.4692	0.387508	0.104554	7.79	189	4.9	0.47	425	14.93	1.79		9.8355	9.1095	6.3805	0.085	1.5	0.21	45	0.03	25	19	0.0181	-0.0091	0.0338	35.8535	0.01105	4.8731	9.38785	0.00905	9.62075	-0.00085	0.03135	1.8975	12	2.2016	0.13983	0.096472	0.018561	0.0059905	0.0022216	0.0015206	0.00089693	0.00059462	0.00057268	0.00053215	0.00044775	1.53499
Vrchlice	2023-09-12	10	2.84377	0.374719	0.100937	7.72	190.1	2.7	0.29	432	10	2.08		9.1015	8.242	6.5795	0.156	1.6	0.27	43	0.01	29	23	0.0037	-0.011	0.0359	38.988	0.01065	4.90765	9.25175	0.34475	9.6488	-0.00105	0.00355	3.3915	20.0646	2.2485	0.14856	0.10457	0.02191	0.0068078	0.0024643	0.0017467	0.00098801	0.00060463	0.00058031	0.0005579	0.00046968	1.80248
Vrchlice	2023-09-12	15	3.38193	0.324197	0.111662	7.6	187.6	2.3	0.26	421	7.75	1.96		8.246	7.767	7.2095	0.111	1.4	0.19	46	0.02	28.8	22	0.0086	-0.01095	0.0371	38.098	0.0121	5.03825	9.12995	0.2421	9.61135	-0.001	0.00425	4.0465	7.48	2.4664	0.15047	0.10678	0.02284	0.0070572	0.0026779	0.0018282	0.0011373	0.00081062	0.00081825	0.00072527	0.00072622	1.9373
Vrchlice	2023-09-12	20	3.92825	0.32459	0.106759	7.43	177.8	2.1	0.24	419	6.99	1.91		8.2075	7.6255	6.725	0.082	1.5	0.44	47	0.08	26.4	22	0.00135	-0.0097	0.032	36.4271	0.0183	5.07215	9.43675	0.3848	9.87775	-0.001	0.0025	4.3375	8.45	2.2323	0.13643	0.096023	0.019306	0.005898	0.0021138	0.0015721	0.00096989	0.00065565	0.00068474	0.00068378	0.0006566	1.78913
Vrchlice	2023-09-12	29	16.6571	0.364647	0.10599	7.23	100.3	1.8	0.21	438	6.76	3.25		11.035	8.9025	8.9915	0.048	0.8	4.6	30	0.11	32.8	60	0.00275	-0.01125	0.044	40.7472	3.42915	5.18835	9.90675	3.40405	9.7189	-0.0009	0.0089	6.346	104.9	1.1433	0.20574	0.15165	0.040637	0.01261	0.0048509	0.0034256	0.00213	0.0014734	0.0013638	0.0013056	0.0011206	2.31104
Vrchlice	2023-09-12	30	27.1649	0.408003	0.10205	7	-156.3	1.8	0.2	657	6.87	-		-	-	-	-	-	-	-	-	-	-	-	-	-	-	-	-	-	-	-	-	-	-	-	-	-	-	-	-	-	-	-	-	-	-	-
Vrchlice	2023-10-09	0	2.23907	0.428476	0.0871738	8.74	63	90.7	8.27	383	16.96	1.66		11.75	10.25	5.236	0.033	1	0.04	47	0.51	30.8	0	0.01575	0	0.0337	28.8685	0.02065	4.9508	11.4307	0.0013	10.3075	0	0.0027	1.185	11.0323	1.8118	0.12671	0.084826	0.015158	0.0059133	0.0034361	0.0029507	0.002645	0.0022655	0.0022254	0.0020199	0.0019326	1.2362
Vrchlice	2023-10-09	2.5	2.1831	0.387342	0.107296	8.77	66.7	89.1	8.12	380	16.94	1.63		11.73	10.25	5.305	0.035	1.3	0.06	47	0.28	31	4	0.0115	0	0.0334	28.6447	0.02175	4.91185	11.2668	0.0008	10.215	0	0.0051	1.1865	11.3548	1.8124	0.12732	0.085521	0.016532	0.007524	0.0048347	0.0044913	0.003983	0.0037198	0.0036135	0.0034323	0.0033598	1.24215
Vrchlice	2023-10-09	5	2.2923	0.395677	0.0933336	8.78	69.2	87.9	8.01	380	16.93	1.61		11.88	10.2	5.383	0.028	1.3	0.06	48	0.09	29.8	4	0.0109	0	0.0333	29.1109	0.01655	4.9022	11.253	0.0006	10.1408	0	0.00145	1.188	12.3226	1.8025	0.12651	0.08484	0.015891	0.0067887	0.0037603	0.0033793	0.0030012	0.0026765	0.0025444	0.0023656	0.0022855	1.24029
Vrchlice	2023-10-09	7.5	2.26057	0.362173	0.100025	8.76	71.1	86.4	7.88	381	16.91	1.67		12.05	10.05	5.446	0.042	1.3	0.08	48	0.6	30.8	3	0.0101	0	0.0333	29.316	0.0155	4.96015	11.3685	0.00055	10.2883	0	0.00235	1.29	13.9355	1.8153	0.12853	0.086754	0.01702	0.0074553	0.0045481	0.0042315	0.0036969	0.0034943	0.0033946	0.0031962	0.0032668	1.27891
Vrchlice	2023-10-09	10	2.94845	0.365134	0.0799748	7.62	92.6	3.6	0.37	437	11.01	2.12		10.45	9.308	5.729	0.066	1.4	0.32	47	0.07	32.6	27	0.00765	0	0.0321	33.5932	0.027	4.9671	11.0233	0.28975	10.3794	0	0.00295	2.849	33.6129	1.9292	0.15196	0.10802	0.02709	0.012463	0.0073543	0.0064383	0.0052934	0.0047326	0.0044775	0.0041833	0.0039921	1.63257
Vrchlice	2023-10-09	15	3.82232	0.318753	0.0847311	7.51	94.9	2.7	0.3	428	8	2.11		8.965	8.455	6.664	0.091	1.5	0.36	46	0.11	30.2	10	0.00665	0	0.0385	34.6441	0.03815	4.9395	10.5134	0.3858	10.1175	0	0.00475	4.2125	31.3548	2.2781	0.1538	0.10961	0.025118	0.0087681	0.0043225	0.0038376	0.0029869	0.0028644	0.0027332	0.002542	0.0025325	1.81904
Vrchlice	2023-10-09	20	5.05925	0.350207	0.0749291	7.37	95.5	2.3	0.27	425	7.11	2.11		8.912	8.418	6.412	0.048	1.3	0.6	45	0.06	33.8	17	0.00515	0	0.03315	33.5323	0.0775	5.08785	11.1516	0.5016	10.3662	0	0.0035	4.593	21.3548	2.0431	0.15223	0.1104	0.029166	0.013358	0.0085211	0.0076027	0.006546	0.0060921	0.0058837	0.0056252	0.0053525	1.80839
Vrchlice	2023-10-09	25	5.95211	0.321182	0.0854626	7.27	93.6	2.1	0.24	427	6.84	2.17		9.311	8.376	6.315	0.042	1.2	0.7	44	0.24	34	9	0.00665	0	0.0328	33.6327	0.10995	5.0913	11.0617	0.60855	10.4127	0	0.0019	4.7325	25.871	1.8995	0.14832	0.10677	0.026078	0.010939	0.00734	0.0068493	0.0062547	0.0060306	0.0059233	0.005846	0.0057545	1.77077
Vrchlice	2023-10-09	27.5	7.35368	0.358002	0.0889784	7.23	90.5	2	0.23	430	6.83	2.2		10.33	9.147	6.45	0.022	1.1	1.5	42	0.15	34.4	43	0.00555	0	0.03275	33.6115	0.22905	5.1099	11.0692	0.7885	10.4322	0	0.0033	4.914	36.8387	1.7501	0.18151	0.13703	0.047111	0.025756	0.018155	0.016257	0.014143	0.012988	0.012511	0.011971	0.011296	1.98437
Vrchlice	2023-10-09	29	22.8064	0.403784	0.112111	6.91	-128.6	1.9	0.22	598	7.07	4.21		16.06	11.71	12.79	0.012	1.9	7.75	26	0.24	44.4	353	0.0067	0	0.0849	38.0607	9.6162	5.7167	12.0211	4.1701	10.2658	0	0.0029	7.27	210.387	1.1186	0.42317	0.34218	0.14572	0.056189	0.026288	0.019927	0.014553	0.011834	0.011252	0.010572	0.0094967	3.61375
Vrchlice	2023-11-14	0	2.64082	0.362493	0.105361	7.9	105.1	82.2	8.76	396	9.93	1.82		10.2	9.415	4.409	0.052	0.7	0.28	47	0.04	29.4	9	0.01	0	0.0313	33.3	0.026	4.734	9.102	0.0013	9.8916	0	0.0271	1.958	7.48387	1.5253	0.13392	0.092263	0.018938	0.0088315	0.0063825	0.005991	0.0052481	0.005208	0.0052462	0.0051699	0.0052733	1.42241
Vrchlice	2023-11-14	2.5	2.60328	0.338411	0.10347	7.89	106	81.9	8.73	396	9.93	1.81		10.03	9.471	4.549	0.044	0.7	0.28	48	0.05	30.6	9	0.011	0	0.032	33.777	0.024	4.83	9.469	0.0007	10.1265	0	0.0062	1.924	6.83871	1.5218	0.1347	0.093008	0.020144	0.010096	0.0074039	0.0069008	0.0061984	0.0060401	0.0059648	0.0058403	0.0060315	1.42224
Vrchlice	2023-11-14	5	2.71895	0.394889	0.127543	7.88	107	81.5	8.68	396	9.93	1.79		10.14	9.367	4.559	0.043	0.6	0.28	47	0.08	30.8	5	0.011	0	0.034	35.395	0.022	4.999	10.036	0.0006	10.7886	0	0.0038	1.951	7.16129	1.5207	0.13493	0.093102	0.020685	0.010982	0.008379	0.0078664	0.0071321	0.0069418	0.0069022	0.0067616	0.0068612	1.44048
Vrchlice	2023-11-14	7.5	2.6435	0.336805	0.11088	7.87	107.7	81.2	8.65	396	9.92	1.74		10.47	9.252	4.594	0.044	0.6	0.28	49	0.04	31.2	7	0.008	0	0.0328	34.963	0.021	4.933	9.681	0.0004	10.2375	0	0.0027	1.957	9.41935	1.5212	0.13567	0.093957	0.021725	0.012189	0.0095134	0.0090146	0.0082288	0.0080342	0.0079832	0.0078588	0.0079675	1.46639
Vrchlice	2023-11-14	10	2.67946	0.355131	0.116918	7.88	108	81	8.63	396	9.91	1.77		10.15	9.567	4.444	0.046	0.7	0.16	47	0.07	31	10	0.009	0	0.0323	34.094	0.021	4.906	9.421	0.0004	10.2193	0	0.0022	1.97	7.16129	1.5257	0.13807	0.096412	0.023986	0.014109	0.011424	0.010837	0.010135	0.0098062	0.009758	0.0095606	0.0097017	1.44319
Vrchlice	2023-11-14	15	3.14239	0.34226	0.112348	7.42	116.8	3.4	0.38	430	8.01	1.8		9.559	8.816	5.019	0.063	0.9	0.28	47	0.05	35	8	0.009	0	0.036	37.267	0.032	4.623	9.646	0.2414	10.5459	0	0.0022	2.939	25.2258	1.6821	0.14627	0.10345	0.025288	0.013067	0.0097437	0.009141	0.0082712	0.008028	0.0079474	0.0078473	0.0079951	1.65914
Vrchlice	2023-11-14	20	4.63627	0.34388	0.100055	7.31	116.3	2.4	0.28	429	7.11	1.82		8.768	8.213	6.146	0.033	1	2.25	44	0.1	29.8	11	0.006	0	0.0372	38.977	0.063	5.141	9.858	0.9127	10.857	0	0.0039	4.383	18.129	1.8771	0.15017	0.10842	0.028462	0.014384	0.010756	0.010036	0.0092964	0.0090127	0.0090003	0.008779	0.0089898	1.82844
Vrchlice	2023-11-14	25	5.86257	0.367443	0.102993	7.24	112.2	2	0.23	441	6.98	1.83		9.351	8.547	6.254	0.027	0.8	3.5	43	0.07	32.4	12	0.006	0	0.0399	40.114	0.108	5.199	10.12	2.0944	11.0002	0	0.0023	4.693	22.6452	1.618	0.16123	0.11694	0.031583	0.016244	0.012137	0.011343	0.010572	0.010322	0.010246	0.010144	0.010262	1.88639
Vrchlice	2023-11-14	29	27.735	0.408528	0.108246	6.96	-124.1	1.9	0.22	636	7.2	4.5		21.36	14.05	16.43	0.034	0.1	12	10	0	45.4	404	0.011	0	0.1076	44.767	13.625	5.754	10.938	10.0895	10.7169	0	0.0052	7.746	521.355	1.2143	0.60503	0.49467	0.22525	0.087339	0.04141	0.031599	0.023746	0.02045	0.019638	0.018931	0.017806	4.30626
Vrchlice	2023-12-12	0	3.16119	0.359378	0.0929287	7.74	232.9	84.3	10.27	399	4.73	1.85		9.0705	8.698	4.217	0.034	1.2	0.36	46	0.07	38.4	8	0.00655	0.01775	0.0322	35.7852	0.02525	4.7113	9.941	0.05805	8.1963	0	0.0362	2.364	6.19355	1.2743	0.095551	0.079477	0.014111	0.003861	0.00080729	0.00020552	0	0	0	0	0	1.09854
Vrchlice	2023-12-12	2.5	3.07616	0.335204	0.0931412	7.68	233.3	83.6	10.18	400	4.74	1.85		9.2555	8.6685	4.207	0.034	1.4	0.37	42	0.05	39.4	16	0.00555	0.01535	0.0321	35.5178	0.01585	4.7394	9.98465	0.05425	8.22825	0	0.0035	2.325	4.25806	1.2757	0.096032	0.079894	0.014604	0.004333	0.0011549	0.0004487	0	0	0	0	0	1.10783
Vrchlice	2023-12-12	5	3.04137	0.380055	0.0953829	7.72	233.7	83.1	10.11	400	4.73	1.83		9.1525	8.8855	4.1535	0.041	1.4	0.35	42	0.06	40.4	11	0.00565	0.01545	0.03175	35.0495	0.0151	4.6809	9.7811	0.05285	8.1128	0	0.0026	2.294	3.93548	1.2774	0.096117	0.079956	0.014543	0.0043378	0.0011845	0.00048399	-2.3842e-05	0	0	0	0	1.08173
Vrchlice	2023-12-12	7.5	3.10207	0.38451	0.100096	7.74	233.8	82.6	10.05	401	4.73	1.76		9.2725	8.894	4.137	0.044	1.2	0.36	47	0.04	39.8	25	0.0054	0.0171	0.0325	35.947	0.01285	4.79535	9.95055	0.0542	8.28455	0	0.00305	2.351	4.90323	1.2737	0.095673	0.079548	0.0146	0.004518	0.0011635	0.00060415	0	0	0	0	0	1.0757
Vrchlice	2023-12-12	10	3.04246	0.383939	0.107933	7.76	234	82.3	10.01	400	4.73	1.76		9.1875	8.9785	4.144	0.041	1.4	0.39	48	0.04	42.6	11	0.0065	0.01355	0.03195	35.1247	0.01915	4.70615	9.5833	0.0528	8.0698	0	0.0038	2.294	3.29032	1.3045	0.11362	0.098337	0.036049	0.02882	0.027726	0.027456	0.026848	0.026685	0.026793	0.026372	0.026806	1.26547
Vrchlice	2023-12-12	15	3.08914	0.370741	0.106426	7.78	234.2	81.8	9.95	401	4.73	1.79		9.2755	9.0035	4.1485	0.043	1.4	0.36	49	0.04	40	10	0.00625	0.0151	0.032	34.474	0.0139	4.7148	9.5884	0.0525	8.05635	0	0.0022	2.2885	6.19355	1.2796	0.095585	0.079527	0.015114	0.0052609	0.0022178	0.0015168	0.00094604	0.00084209	0.00073099	0.00063181	0.00056791	1.06164
Vrchlice	2023-12-12	20	3.12882	0.392403	0.106396	7.79	234.4	81.4	9.9	401	4.74	1.81		9.377	9.1935	4.181	0.046	1.3	1.75	47	0.04	42.8	12	0.00625	0.0146	0.0322	35.3456	0.0178	4.7433	9.6038	0.0525	8.128	0	0.0025	2.287	6.83871	1.2813	0.096699	0.08078	0.016236	0.006249	0.0030098	0.0022917	0.0017786	0.0015564	0.0014572	0.0014076	0.0013175	1.05182
Vrchlice	2023-12-12	25	3.05783	0.354612	0.103413	7.78	232.6	80.3	9.76	400	4.74	1.8		9.5685	9.266	4.192	0.04	1.1	2	44	0.05	40	12	0.00465	0.0153	0.0324	35.1728	0.0113	4.7543	9.5484	0.05265	8.12005	0	0.0029	2.297	6.19355	1.2827	0.094732	0.079022	0.01467	0.0046797	0.001431	0.00073957	0.00023031	-2.9087e-05	0	0	0	1.02236
Vrchlice	2023-12-12	29	3.1218	0.371708	0.0948869	7.8	159	78.4	9.53	409	4.76	1.85		9.671	9.1645	4.237	0.04	1.6	2	43	0.03	43.2	7	0.00625	0.01545	0.0327	35.1827	0.01975	4.74355	9.447	0.0578	8.01785	0	0.0021	2.295	16.1935	1.2784	0.094696	0.078626	0.014673	0.0047479	0.0014009	0.0007019	0.00017786	0	0	0	0	1.03329
Vrchlice	2024-02-06	0	3.37722	0.327126	0.0897388	7.27	106.9	92.4	11.54	350	3.62	1.33	8.08	10.315	9.941	7.373	0.077	3	0.11	45	0	23.4	22	0.2787	0.0161	0.03285	29.6187	0.21985	4.52335	8.0834	0.01115	8.157	0.01235	0.00215	4.914	33.6129	2.8045	0.22378	0.16358	0.045912	0.020718	0.012999	0.011516	0.010001	0.0095043	0.0094013	0.00911	0.0091043	2.25108
Vrchlice	2024-02-06	2.5	3.29117	0.358215	0.0966223	7.35	110.4	91.7	11.44	358	3.62	1.3	8.28	10.42	10.525	7.356	0.09	2.6	0.11	46	0	18.6	29	0.2688	0.01475	0.03235	29.3805	0.2061	4.385	7.95145	0.01015	8.0308	0.012	0.00075	4.855	39.4194	2.809	0.23689	0.17413	0.050694	0.02363	0.015128	0.013361	0.011599	0.011034	0.010807	0.010548	0.010339	2.25074
Vrchlice	2024-02-06	5	3.31014	0.303356	0.0790835	7.39	112.5	91.3	11.39	360	3.62	1.28	9.34	10.455	10.5	7.4395	0.085	2.9	0.11	47	0	29.6	35	0.2913	0.01445	0.03295	29.5652	0.2184	4.56715	8.07005	0.0102	8.17615	0.0129	0.00015	4.9945	39.4194	2.853	0.27287	0.2058	0.070401	0.037736	0.025609	0.022867	0.019605	0.018115	0.017607	0.017149	0.01643	2.59876
Vrchlice	2024-02-06	7.5	3.37029	0.330013	0.0893576	7.42	114.2	90.9	11.34	359	3.62	1.28	8.18	10.545	10.95	7.483	0.081	1.5	0.09	45	0	22.6	34	0.3073	0.01475	0.03315	29.8039	0.22875	4.5848	8.086	0.01025	8.2732	0.0136	0.00035	5.0135	37.8065	2.8088	0.24949	0.18516	0.057705	0.029416	0.020183	0.018312	0.01616	0.015481	0.015239	0.014881	0.014707	2.27845
Vrchlice	2024-02-06	10	3.36452	0.319514	0.073973	7.44	115.6	90.7	11.31	360	3.62	1.34	8.28	10.545	10.33	7.364	0.088	1.5	0.1	46	0	24	35	0.2766	0.0154	0.03205	28.9282	0.20725	4.4791	7.74445	0.00955	7.95175	0.01215	0.001	4.79	43.6129	2.8195	0.23705	0.17335	0.047361	0.018672	0.0095415	0.0077724	0.0061922	0.0052652	0.0050535	0.004765	0.0044398	2.29477
Vrchlice	2024-02-06	15	3.32901	0.297668	0.0841731	7.47	117.3	90.4	11.27	360	3.63	1.3	8.21	10.745	10.375	7.4	0.08	1.4	0.11	45	0.2	25.8	29	0.30385	0.01535	0.03285	29.1408	0.22195	4.53545	7.83985	0.00985	8.11645	0.0131	0.0007	4.915	38.7742	2.772	0.21209	0.15364	0.03884	0.01498	0.0076189	0.0064473	0.0052009	0.0046635	0.0045543	0.0043283	0.0041857	2.04424
Vrchlice	2024-02-06	20	3.33834	0.310504	0.0874295	7.49	118.3	90.3	11.25	360	3.64	1.32	8.29	10.955	10.31	7.389	0.081	1.7	0.1	38	0.22	25.2	37	0.312	0.01565	0.03285	29.2713	0.22665	4.39435	7.80395	0.01005	8.0245	0.0134	0.0046	4.9545	38.7742	2.8089	0.24387	0.17917	0.05129	0.022189	0.012701	0.010733	0.0089102	0.0081205	0.0077953	0.0075164	0.0071535	2.36537
Vrchlice	2024-02-06	25	3.31848	0.355149	0.0914352	7.51	119.8	89.8	11.19	360	3.64	1.33	8.63	11.635	10.52	7.555	0.08	1.3	0.1	43	0.06	24.4	36	0.30585	0.0147	0.0327	29.0226	0.2233	4.5074	7.739	0.00975	7.99475	0.0133	0.00135	4.914	58.7742	2.8073	0.23873	0.17515	0.050266	0.022275	0.013135	0.011491	0.0099211	0.0090456	0.0088792	0.0085607	0.0082765	2.2693
Vrchlice	2024-02-06	30	3.3061	0.364919	0.0966091	7.52	120.7	89.8	11.19	361	3.64	1.31	8.31	11.16	10.58	7.4215	0.08	1.4	0.11	45	0.12	28.2	36	0.30355	0.014	0.0331	29.3655	0.2208	4.5597	7.7378	0.0099	8.0513	0.0131	0.00065	4.9415	39.4194	2.8206	0.24303	0.17915	0.052867	0.024514	0.015326	0.013526	0.011797	0.010901	0.010622	0.010268	0.010052	2.29707
Vrchlice	2024-03-12	0	3.11302	0.286807	0.0864887	7.89	229.1	108.2	12.29	359	7.12	1.22	7.92	10.5	9.5915	8.424	0.017	1.3	0.04	48	0.03	31.2	23	0.2052	0.01525	0.02415	32.1757	0.17195	4.10895	9.14765	0.00235	7.9838	0.00845	0.03685	5.0775	24.2581	2.8111	0.19051	0.13729	0.030563	0.0087266	0.0023279	0.0013752	0.00033951	-0.00026703	-0.00037527	-0.00050259	-0.00056171	1.98624
Vrchlice	2024-03-12	2.5	3.26647	0.314826	0.0744778	7.99	229.2	108.1	12.27	357	7.12	1.15	7.28	10.48	9.6435	8.3035	0.017	1	0.02	48	0.13	29.6	22	0.21695	0.01525	0.0232	31.0572	0.16235	4.03195	8.8284	0.00195	7.75865	0.00835	0.0399	5.0365	22.9677	2.8208	0.19414	0.13993	0.032802	0.010099	0.0030413	0.0020013	0.00091171	0.00035191	0.00017595	9.6798e-05	-8.5354e-05	2.01317
Vrchlice	2024-03-12	5	3.21354	0.289925	0.0751629	8.03	229.6	107.8	12.24	358	7.12	1.17	7.06	10.815	9.7475	8.438	0.015	1.4	0.01	48	0.06	30.4	18	0.21095	0.0131	0.0241	32.1791	0.16475	4.10425	8.9884	0.00205	7.89745	0.00865	0.0271	4.995	24.2581	2.8209	0.1951	0.14095	0.033271	0.010407	0.0031462	0.0020843	0.000947	0.00037146	0.00010014	9.5367e-07	-7.6294e-05	2.00154
Vrchlice	2024-03-12	7.5	3.16872	0.303395	0.08007	7.88	239.1	99.8	11.61	358	6.14	1.19	7.29	10.375	9.68	8.2525	0.029	1.6	0.01	38	0.05	30.4	20	0.2127	0.0151	0.023	31.2118	0.17045	4.04895	8.66645	0.002	7.6645	0.00895	0.02305	4.91	20.0645	2.8162	0.20198	0.14615	0.035388	0.011299	0.0038404	0.0024676	0.0013218	0.00067186	0.00045204	0.0003643	0.00021076	2.08657
Vrchlice	2024-03-12	10	3.30843	0.289536	0.0699938	7.75	244.6	92.7	10.93	357	5.59	1.14	7.48	10.47	9.7035	8.253	0.021	1.6	0.02	36	0.05	30.6	23	0.2569	0.01405	0.02315	30.4845	0.18705	4.079	8.61015	0.0023	7.7201	0.01025	0.03	4.9865	20.7097	2.8039	0.20728	0.15033	0.036666	0.012016	0.0041604	0.0027161	0.0014915	0.00084639	0.00062895	0.0004487	0.0002985	2.13614
Vrchlice	2024-03-12	15	3.3816	0.282399	0.0695759	7.75	244.6	92.7	10.93	357	5.59	1.17	7.34	10.245	10.0255	8.0145	0.014	2	0.03	46	0.06	16	30	0.26535	0.0158	0.02355	31.1407	0.20085	4.16435	8.6219	0.0044	7.7074	0.0114	0.022	4.9715	21.0323	2.8588	0.22025	0.16029	0.040592	0.013454	0.0049157	0.0034323	0.0020657	0.0011611	0.0010037	0.0008111	0.00068188	2.1969
Vrchlice	2024-03-12	20	3.22958	0.296059	0.082718	7.63	248.3	86.8	10.32	359	5.28	1.17	7.16	10.685	9.989	8.193	0.013	1.7	0.02	44	0.05	24.6	21	0.252	0.01575	0.02415	31.84	0.18985	4.17375	8.78645	0.006	7.75995	0.0104	0.02905	5.053	22	2.8096	0.20724	0.15014	0.036771	0.012016	0.0041475	0.0028076	0.0015135	0.00086546	0.00062609	0.00051069	0.0004096	2.07468
Vrchlice	2024-03-12	25	3.36634	0.314062	0.0829011	7.51	251.9	79.5	9.48	365	5.14	1.22	7.3	10.595	10.17	7.999	0.018	1.8	0.06	44	0.22	27.4	26	0.25745	0.01485	0.02465	31.7899	0.1967	4.25685	8.709	0.0254	7.754	0.01075	0.05895	4.997	24.2581	2.846	0.2169	0.15772	0.039657	0.013466	0.0050344	0.0035133	0.0021467	0.0014296	0.0011358	0.0010533	0.00091171	2.13274
Vrchlice	2024-03-12	30	3.37258	0.295056	0.0821798	7.45	253.4	75.7	9.03	368	5.13	1.17	7.09	10.605	10.54	8.038	0.019	1.8	0.07	44	0.07	28.4	21	0.27265	0.0158	0.0242	31.6055	0.1959	4.1605	8.63505	0.03435	7.7451	0.01025	0.05335	5.114	22.9677	2.8022	0.20539	0.14855	0.036362	0.012138	0.0044909	0.0033402	0.0021644	0.0015941	0.00144	0.0012937	0.0012455	1.94867
Vrchlice	2024-04-09	0	2.40283		0.0815603	8.48	132.6	116.2	10.85	364	15.71	1.3	6.85928	10.44	9.044	7.809	0.028	4	0.02	46	0.09	23.8	27	0.0535	0.01635	0.02895	33.5309	0.0272	4.1264	7.67395	0.00105	6.7849	0.00035	0.0317	4.205	9.41935	2.7617	0.17818	0.12841	0.030465	0.012146	0.0064831	0.0058084	0.0043077	0.0037899	0.0036521	0.003469	0.0032043	1.97015
Vrchlice	2024-04-09	2.5	2.43464		0.0870859	8.43	141.9	112.2	11.44	364	11.72	1.38	6.87461	9.703	8.689	7.829	0.028	3.2	0.01	47	0.06	23.4	28	0.0487	0.0151	0.02965	33.3701	0.0226	4.1337	7.7	0.00055	6.8348	0.00035	0.0738	4.287	13.2903	2.7655	0.17976	0.12998	0.031662	0.01243	0.006443	0.0055294	0.0040908	0.0035825	0.0034189	0.0031877	0.002923	2.06882
Vrchlice	2024-04-09	5	2.45612	0.32	0.0812797	8.05	159.2	95.4	10.1	366	10.12	1.27	6.92826	9.129	8.523	7.788	0.027	2.8	0.02	46	0.04	23.8	28	0.0305	0.01615	0.03025	33.6394	0.0258	4.1993	7.70855	0.00055	6.82675	0.00055	0.00195	4.3475	12.9677	2.7739	0.17938	0.12948	0.032154	0.013216	0.0072002	0.0062652	0.0047131	0.0043125	0.0041223	0.0040092	0.0037141	2.10466
Vrchlice	2024-04-09	7.5	2.64897		0.0898802	7.86	167.5	86.5	9.54	365	8.39	1.29	6.72133	8.883	8.763	7.883	0.027	2.8	0.02	47	0.05	23.4	29	0.08105	0.015	0.0305	33.1405	0.04185	3.9906	7.53905	0.0009	6.7476	0.00155	0.06375	4.4965	12.3226	2.7694	0.18153	0.13149	0.033899	0.014523	0.0081825	0.0071511	0.005693	0.0050035	0.0048785	0.0046415	0.0043941	2.07155
Vrchlice	2024-04-09	10	2.93559		0.0892261	7.69	174.4	76.9	8.85	364	6.64	1.32	7.93224	9.081	8.652	7.934	0.036	3.4	0.01	43	0.08	23.2	32	0.11115	0.01655	0.0317	33.8289	0.09425	4.2774	7.65765	0.0036	6.82445	0.00445	0.0026	4.9195	42.6452	2.7933	0.19235	0.14015	0.038185	0.017186	0.010425	0.0092516	0.0076919	0.0069575	0.0067348	0.0065017	0.0062671	2.22319
Vrchlice	2024-04-09	15	3.21383		0.0794742	7.63	176.8	75.5	8.9	361	5.68	1.26	6.75198	8.938	9.396	7.725	0.029	3	0.01	43	0.05	23.8	38	0.21545	0.01425	0.03095	32.9796	0.1523	4.2909	7.4328	0.01105	6.7246	0.0082	0.0282	5.1835	12.3226	2.8448	0.20953	0.15326	0.043005	0.018777	0.010943	0.0095243	0.0078187	0.0069003	0.0067391	0.006402	0.0060902	2.22999
Vrchlice	2024-04-09	20	3.24793		0.0803987	7.5	181.7	63.4	7.52	365	5.44	1.31	6.85928	8.858	8.874	7.817	0.029	2.7	0	44	0.08	24.4	38	0.2053	0.01415	0.0307	32.59	0.14985	4.2641	7.28995	0.0359	6.6196	0.00795	0.02555	5.1035	19.4194	2.7987	0.20924	0.15304	0.042385	0.018558	0.010575	0.0092158	0.0073581	0.006547	0.0062385	0.0060096	0.0056238	2.3579
Vrchlice	2024-04-09	25	3.22089		0.0861842	7.38	185.3	52.1	6.19	367	5.37	1.32	10.8752	9.448	8.814	7.627	0.06	2.7	0	45	0.05	24	35	0.2128	0.0161	0.03195	33.4011	0.15035	4.3515	7.5013	0.0895	6.7548	0.00755	0.0422	5.2315	137.806	2.7613	0.20307	0.14832	0.040775	0.017915	0.010694	0.0094938	0.0076952	0.0068626	0.0066142	0.0064406	0.0061121	2.30395
Vrchlice	2024-04-09	30	3.43365		0.096595	7.29	183.1	36.9	4.39	370	5.36	1.4	8.49171	9.336	8.528	7.279	0.108	2.5	0	45	0.08	23.6	34	0.20395	0.015	0.0342	34.0754	0.1661	4.3573	7.5144	0.2607	6.69135	0.008	0.05235	5.3345	54.9032	2.7472	0.19892	0.1449	0.03976	0.017568	0.010631	0.0093441	0.0077753	0.0069737	0.0067849	0.0065517	0.0062904	2.33255
Vrchlice	2024-05-14	0	0.126786	0.285227	0.0684494	8.66	81.9	104.1	9.11	379	18.95	1.48	10.01	9.393	9.39	7.038	0.039	3	0.04	49	0.05	28.8	12	0.0658	0.01225	0.0317	32.406	0.0308	4.3742	7.9229	0.00195	8.45595	0	0.0113	0.1325	10.3871	2.7139	0.15819	0.11154	0.021405	0.0065179	0.0026832	0.0020728	0.0012431	0.0010142	0.00092936	0.00091267	0.00088167	1.68466
Vrchlice	2024-05-14	2.5	0.122778	0.290511	0.0626726	8.87	82.9	115.2	10.45	375	17.25	1.43	10.55	9.336	9.007	7.128	0.038	3.2	0.04	49	0.04	27.6	12	0.0451	0.01235	0.0323	32.3555	0.03055	4.19	8.092	0.0017	8.43335	0	0.00315	0.1315	14.2581	2.7253	0.16197	0.11466	0.023746	0.0082512	0.0030141	0.0022783	0.0015354	0.00096846	0.00091887	0.00092316	0.00076818	1.79827
Vrchlice	2024-05-14	5	0.441993	0.32246	0.0723752	7.99	126	86.3	8.78	375	12	1.38	10.47	9.265	8.834	7.313	0.035	3.4	0.02	49	0.05	28.6	11	0.0573	0.00935	0.0325	32.822	0.02985	4.3931	8.04155	0.0014	8.4372	0	0.00505	0.6615	16.8387	2.7519	0.1664	0.11875	0.025975	0.009347	0.0036631	0.0026655	0.0018053	0.0013833	0.0012274	0.001224	0.0010586	1.88363
Vrchlice	2024-05-14	7.5	1.66883	0.264373	0.0724536	7.66	137.5	57	6.03	373	10.39	1.42	9.23	8.751	8.436	7.538	0.044	3.3	0.13	49	0.04	12.4	9	0.0186	0.00915	0.03345	32.7302	0.01485	4.2387	8.0564	0.00265	8.44715	0	0.00485	2.886	8.45161	2.7346	0.16614	0.11854	0.025951	0.0094004	0.0037794	0.0029225	0.0020275	0.0016303	0.0014648	0.0014877	0.0013294	1.96942
Vrchlice	2024-05-14	10	2.64639	0.273943	0.0736195	7.51	143.2	43	4.82	367	7.91	1.43	9.85	8.314	8.316	7.638	0.056	2.6	0.08	46	0.05	26.8	9	0.0434	0.01385	0.03405	32.4695	0.02165	4.48535	8.0849	0.00585	8.556	0	0.0216	4.4615	5.54839	2.7861	0.1731	0.12378	0.028119	0.0099277	0.0042076	0.0034928	0.0025449	0.0021219	0.0020046	0.0020375	0.0018549	2.08153
Vrchlice	2024-05-14	15	2.9478	0.279554	0.0723091	7.46	145.4	48.5	5.71	364	6.03	1.38	10.12	8.522	8.404	7.663	0.013	2.4	0.07	45	0.07	25.2	15	0.16175	0.0126	0.0318	31.0046	0.1106	4.25825	7.6151	0.0049	8.15385	0.00475	0.0127	5.072	10.3871	2.8171	0.19197	0.13835	0.033562	0.01198	0.0054007	0.0041285	0.0030212	0.0025148	0.0023322	0.0023642	0.0020986	2.28427
Vrchlice	2024-05-14	20	3.11457	0.298488	0.0719715	7.36	148	33.6	3.99	365	5.66	1.32	13.41	8.691	8.658	7.567	0.015	3.1	0.02	46	0.07	27.8	15	0.1361	0.0117	0.0321	31.5742	0.1025	4.54575	7.74255	0.00365	8.31275	0.00435	0.0057	5.1075	10.7097	2.794	0.19438	0.14026	0.034262	0.012799	0.0060163	0.0048246	0.0038481	0.0031981	0.0030713	0.0029702	0.0028467	2.24509
Vrchlice	2024-05-14	25	3.26551	0.262378	0.0681162	7.25	148.3	6.7	0.8	367	5.57	1.45	10.63	8.844	8.631	7.322	0.024	2.2	0.05	46	0.05	27.6	13	0.0935	0.0101	0.03185	31.4892	0.0735	4.31595	7.6594	0.00945	8.1561	0.0027	0.0038	5.0515	18.7742	2.7432	0.18991	0.13673	0.032979	0.012495	0.00594	0.0049129	0.0038943	0.0033593	0.0032411	0.003222	0.0031118	2.20032
Vrchlice	2024-05-14	30	3.61013	0.272158	0.0624473	7.25	56	3.3	0.39	394	5.58	1.65	10.32	9.445	8.726	6.371	0.063	2.1	0.62	45	0.13	25.4	13	0.1345	0.01085	0.03475	32.9233	0.1133	4.46415	7.8341	0.73385	8.30485	0.00405	0.00725	5.3825	32.3226	2.6185	0.18935	0.13604	0.032976	0.012131	0.0059428	0.0049386	0.0039968	0.0034981	0.0034413	0.0033188	0.0032039	2.16995
Vrchlice river- inlet Malešov bridge	2024-05-14		4.68089	0.379425	0.0855075	7.71	103.5	94.3	8.53	404	17.5	1.93	11.44	10.3	9.883	3.358	0.055	1.4	0.1	54	0.08	30.4	14	0.0474	0.0121	0.03505	34.2107	0.18105	4.5219	9.25365	0.1514	9.33	0.00035	0.0035	3.9015	51.6774	1.7441	0.20847	0.15109	0.036895	0.013751	0.0063572	0.0052509	0.0042257	0.0037379	0.0035496	0.0034623	0.0034075	2.10938
Vrchlice river upstream of Hamerský pond	2024-05-14		2.84163	0.366766	0.0816441					376	15.3	1.62	10.32	8.5	8.321	3.549	0.019	1.5	0.01	53	0.06	29.2	15	0.02435	0.0119	0.03315	32.3859	0.09225	4.3338	8.39245	0.05425	9.08405	0	0.01595	4.028	12.9677	1.8024	0.1845	0.13223	0.029615	0.0081644	0.0017781	0.00069189	-0.0002327	0	0	0	0	2.21728
Vrchlice river by Sion castle	2024-05-14		4.32741	0.339138	0.0790674					316	13.8	1.4	11.9	9.751	8.941	3.431	0.02	1.5	0.04	45	0.07	23.9	20	0.04895	0.012	0.0319	27.0236	0.14855	4.28625	6.90405	0.04225	8.3444	0	0.00625	4.614	6.83871	1.7748	0.22347	0.16042	0.038024	0.011379	0.003201	0.0017419	0.00052881	-1.049e-05	-0.00013733	-0.0002203	0	2.49938
[truncated: 12 more columns]

## Sheet:  Souš data
			Germanium speciation data (IAC)				Ancillary data (IH)
			Values below LOQ (relative error up to 30%) are in red
			Values below LOD are in Italics
System	Sampling date	Depth (m)	iGe (ng/L)	MGe (ng/L)	DMGe (ng/L)	pH (-)	ORP (mV)	%DO	DO (mg/L)	Conductivity (µS/cm)	Temperature (°C)	Alkalinity (mmol/L)	CODMn (mg/L)	TOC (mg/L)	DOC (mg/L)	TN (mg/L)	NO2-N (mg/L)	NO3-N (mg/L)	NH3-N (mg/L)	SO42- (mg/L)	PO43- (mg/L)	Cl- (mg/L)	Color455 nm (PtCo)	Al396.152 nm (mg/L)	B208.956 nm (mg/L)	Ba455.403 nm (mg/L)	Ca422.673 nm (mg/L)	Fe238.204 nm (mg/L)	K766.491 nm (mg/L)	Mg279.553 nm (mg/L)	Mn257.610 nm (mg/L)	Na589.592 nm (mg/L)	Ti336.122 nm (mg/L)	Zn213.857 nm (mg/L)	Si251.432 nm (mg/L)	Turbidity (NTU)	Abs210 nm	Abs254 nm	Abs280 nm	Abs365 nm	Abs436 nm	Abs520 nm	Abs560 nm	Abs620 nm	Abs680 nm	Abs700 nm	Abs720 nm	Abs780 nm	SUVA [L/(mg.m)]
Souš	2023-05-16	0	18.0856	<0.04	<0.09	6.42	288.8	77.3	7.17	19	10.54	0.1		7.0355	6.283	0.3071	0	0.4	0.02	1	0.03	5.7	36	0.252	0	0.0048	1.4244	0.0645	0.3064	0.4034	0.014	0.7404	0.0002	0.0123	3.526	14.5152	0.40547	0.24167	0.18037	0.047286	0.012653	0.0036755	0.0020294	0.0016055	0.00094843	0.00031567	0.00013685	-5.1498e-05	3.84641
Souš	2023-05-16	2.5	17.5588	<0.04	<0.09	6.34	299.7	76.8	7.13	19	10.5	0.08		6.511	6.0355	0.27545		0.2	0.02	1	0.04	2.7	36	0.2528	0	0.0048	1.3994	0.0696	0.1905	0.4051	0.0144	0.7099	0.0002	0.0105	3.505	12.0909	0.41925	0.24244	0.18135	0.047985	0.012827	0.0036645	0.0022264	0.0017619	0.0010047	0.00037956	0.00023842	6.9141e-05	4.0169
Souš	2023-05-16	5	17.1559	<0.04	<0.09	6.2	313.5	76.1	7.08	19	10.46	0.09		6.474	5.9955	0.22005		0.3	0	2	0.06	1.9	34	0.2424	0.0006	0.0046	1.3594	0.0618	0.1817	0.3907	0.0138	0.6909	0	0.0097	3.439	12.0909	0.39577	0.2378	0.17736	0.046734	0.012503	0.0036283	0.0021391	0.0016837	0.0010839	0.00045252	0.0002141	6.6757e-05	3.96631
Souš	2023-05-16	7.5	17.7526	<0.04	<0.09	6.09	325.3	73.9	7.12	21	8.99	0.1		6.1025	6.011	0.22425	0	0.3	0.02	1	0.03	9.8	34	0.2583	0.0006	0.0049	1.4051	0.073	0.1891	0.4083	0.0147	0.7179	0.0001	0.0045	3.596	11.7879	0.40533	0.23971	0.17864	0.04782	0.013036	0.0037422	0.0022888	0.001801	0.0010304	0.00038147	0.00015736	-3.8147e-06	3.98786
Souš	2023-05-16	8	17.8557	<0.04	<0.09	5.71	340.8	72.5	7.19	20	7.79	0.1		6.508	5.9545	0.3662		0.2	0.04	1	0.03	14	35	0.2516	0	0.005	1.4868	0.0719	0.2289	0.4241	0.0155	0.73	0.0003	0.0073	3.63	26.9394	0.42609	0.24481	0.18307	0.048529	0.013143	0.0037198	0.002131	0.0017099	0.00095177	0.00021982	-2.3842e-05	-0.00011301	4.11134
Souš	2023-06-06	0	17.2017	<0.11	<0.07	6.89	266.9	73.5	6.1	20	16.2	0.1		18.37	17.78	0.2769	4	0.3	0.02	1	0.03	1	27	0.2166	0.0026	0.0035	1.1909	0.0524	0.604	0.3629	0.0117	0.689	0.0001	0.0083	3.535	7.24242	0.35854	0.21548	0.1598	0.041274	0.011744	0.0044818	0.0020294	0.0027523	0.0023136	0.0018449	0.0016298	0.0014319	1.21192
Souš	2023-06-06	2.5	17.5927	<0.11	<0.07	6.74	283	73.1	6.08	21	16.08	0.1		17.845	17.605	0.2865		0.2	0.01	3	0.03	0.9	27	0.2187	0.0007	0.0036	1.1607	0.0494	0.5693	0.366	0.0115	0.6877	0	0.0043	3.605	7.24242	0.36225	0.21664	0.16099	0.042106	0.012232	0.0048971	0.0022264	0.0033283	0.0029206	0.0024462	0.0021925	0.0020823	1.23056
Souš	2023-06-06	5	17.7427	<0.11	<0.07	6.64	296.1	75	6.79	24	12.24	0.1		16.745	16.955	0.2468		0.2	0.02	1	0.03	0.9	28	0.2141	0.0023	0.0038	1.2753	0.0629	0.5605	0.3833	0.0116	0.7159	0	0.0065	3.727	6.93939	0.36276	0.21175	0.15841	0.042604	0.01293	0.0054698	0.0021391	0.003665	0.0032973	0.0028062	0.002563	0.0023804	1.24889
Souš	2023-06-06	7.5	18.8398	<0.11	<0.07	6.37	313.5	70.1	6.79	26	9.32	0.1		17.525	16.835	0.26875		0.3	0.02	4	0.02	0.9	32	0.251	0.0029	0.0052	1.5156	0.0848	0.257	0.4291	0.0179	0.7134	0.0003	0.009	3.652	6.93939	0.39134	0.22999	0.17196	0.046253	0.012783	0.0041766	0.0022888	0.0022192	0.0016589	0.0010896	0.00094271	0.00073957	1.36614
Souš	2023-06-06	10	19.1324	<0.11	<0.07	6.01	318.9	66.6	6.65	28	8.03	0.1		19.16	18.92	0.3007		0.2	0.02	2	0.03	0.9	32	0.2655	0.0025	0.0053	1.3419	0.0959	0.2177	0.409	0.0194	0.6698	0.0006	0.0052	3.614	7.84848	0.40454	0.23504	0.17533	0.047223	0.012658	0.0038791	0.002131	0.0019407	0.0013876	0.00085115	0.00062466	0.00044632	1.24228
Souš	2023-06-06	14	19.4636	<0.11	<0.07	5.83	256.8	61.6	6.22	31	7.66	0.08		18.225	19.735	0.31485	3	0.2	0.03	5	0.02	1	41	0.2677	0.0009	0.0044	1.146	0.1078	0.5912	0.3558	0.0184	0.6617	0.0002	0.0071	3.608	9.66667	0.41521	0.24116	0.18002	0.04868	0.013436	0.0043993		0.0022707	0.0017557	0.0012603	0.0010386	0.00086498	1.22199
Souš	2023-07-13	0	16.7348	<0.06	<0.02	6.73	316.3	106.6	8.15	22	20.75	0.09		5.8085	4.5555	0.3179	0.004	0.3	0	0	0	1	11	0.1671	0.00195	0.00045	1.4662	0.0866	0.4337	0.4438	0.00965	0.9476	0.0005	0.00445	3.675	12.7	0.28048	0.16986	0.12567	0.030896	0.0084434	0.0028553	0.0017271		0.00093079	0.00049496	0.00028372	8.0109e-05	3.72868
Souš	2023-07-13	2.5	16.9389	<0.06	<0.02	6.62	329.4	105.3	8.84	25	16.19	0.09		5.863	4.535	0.2993	0.004	0.4	0	0	0	0.9	11	0.1677	0.00085	0.0004	1.4934	0.08865	0.40595	0.45065	0.01335	0.9511	0.0005	0.01045	3.664	14.5	0.28784	0.17136	0.12695	0.032295	0.0093188	0.0028791	0.0019298		0.0010362	0.00043392	0.00034237	0.00011635	3.77861
Souš	2023-07-13	5	16.4637	<0.06	<0.02	6.01	351.6	87	8.13	25	11.38	0.1		5.5705	4.4165	0.28815	0.006	0.3	0	0	0	0.8	14	0.16855	0.0015	0.0014	1.56465	0.1028	0.4408	0.4669	0.01015	0.9885	0.00065	0.00345	3.9125	13	0.2892	0.17078	0.12645	0.031539	0.0085473	0.0030546	0.0019259		0.00090551	0.00061178	0.0002923	0.00019932	3.86686
Souš	2023-07-13	7.5	17.7877	<0.06	<0.02	5.94	351.2	86.6	8.11	25	11.27	0.1		5.498	4.86	0.2792	0.004	0.4	0	0	0	0.9	20	0.20795	0.00075	0.0039	1.50985	0.1536	0.42755	0.45775	0.01595	0.94935	0.0006	0.00385	3.97	9.36	0.34147	0.2002	0.14986	0.040359	0.011388	0.0036082	0.0022945		0.0011439	0.00058937	0.00037718	0.00016499	4.11934
Souš	2023-07-13	10	19.7302	<0.06	<0.02	5.76	354.3	78.9	7.77	28	9.15	0.09		5.9325	5.3975	0.3392	0.004	0.5	0.03	0	0	0.9	22	0.25185	0.0015	0.00485	1.355	0.20955	0.4193	0.4235	0.0222	0.86525	0.00115	0.0043	3.819	9.06	0.38774	0.22649	0.16978	0.047569	0.013834	0.0043283	0.0027976		0.0015655	0.00091362	0.00056314	0.00042534	4.1962
Souš	2023-07-13	14	20.4031	<0.06	<0.02	5.62	262.8	69	6.88	31	8.62	0.08		6.0655	5.1705	0.3679	0.005	0.5	0.06	0	0	0.9	24	0.26725	0.0004	0.00535	1.32885	0.28185	0.41145	0.4118	0.02655	0.83915	0.0011	0.00425	3.753	44.5	0.40299	0.23144	0.17362	0.049238	0.014519	0.0047054	0.0030627		0.0017614	0.0010581	0.00073385	0.00063324	4.47616
Souš	2023-08-15	0	18.8308	<0.04	<0.03	6.93	259.3	120.7	9.85	23	18.3	0.1		5.892	4.388	0.28005	0	0.2	0.01	0	0	0.8	21	0.1331	0.00265	0.00225	1.88545	0.09625	0.46885	0.4721	0.00205	0.9803	-0.00025	0.0013	3.87	8.12903	0.27064	0.15958	0.11822	0.028605	0.0079479	0.0026636	0.0018711	0.0011115	0.0008688	0.00075483	0.00072718	0.00059748	3.63674
Souš	2023-08-15	2.5	18.6579	<0.04	<0.03	6.96	270.1	118.5	9.94	23	16.99	0.11		6.0505	4.6565	0.2752	0	0.2	0.01	0	0	0.8	20	0.1328	0.0005	0.00255	1.75365	0.0959	0.4496	0.46635	0.0017	0.9629	-0.0003	0.00165	3.8495	8.45161	0.29602	0.1706	0.1282	0.031382	0.0090837	0.0031514	0.0021605	0.0012732	0.00097513	0.00089121	0.00084877	0.00066376	3.6637
Souš	2023-08-15	5	19.2115	<0.04	<0.03	6.92	279.5	114.3	9.84	23	15.74	0.11		6.159	4.794	0.30875	0	0.1	0.03	0	0	0.9	21	0.14205	0	0.00335	1.81075	0.10675	0.4624	0.4741	0.0026	0.9783	-0.0003	0.00205	3.886	9.74194	0.28719	0.16609	0.12388	0.030571	0.0087948	0.0032458	0.0022192	0.001452	0.0011334	0.00098181	0.00090408	0.00070858	3.46454
Souš	2023-08-15	7.5	25.0074	<0.04	<0.03	6.16	316.9	91.5	8.38	25	12.95	0.11		7.674	6.6635	0.3161	0	0.1	0.02	0	0	0.9	34	0.2394	0.00065	0.00435	1.7073	0.17265	0.43435	0.46275	0.0091	0.92725	0.0004	0.00315	3.9955	8.45161	0.42237	0.24985	0.18712	0.049027	0.013851	0.0045352	0.0029116	0.0016594	0.0011249	0.0010109	0.00080824	0.00072718	3.74953
Souš	2023-08-15	10	27.8612	<0.04	<0.03	5.83	323.8	78.3	7.32	27	12.01	0.11		8.8095	7.7955	0.3542	0.001	0.2	0.02	0	0	1	40	0.31565	0.00085	0.00535	1.62245	0.27365	0.5025	0.45015	0.01905	0.88005	0.00095	0.00265	4.0175	8.77419	0.52409	0.30733	0.23173	0.06306	0.017625	0.0057392	0.0037456	0.0021601	0.0013976	0.0012746	0.0011196	0.00086355	3.9424
Souš	2023-08-15	13	23.4268	<0.04	<0.03	5.71	266.1	50.8	5.03	31	9.48	0.1		6.945	5.8935	0.3642	0	0.1	0.06	0	0	0.9	32	0.2854	-0.0001	0.00565	1.5903	0.36735	0.4774	0.441	0.03105	0.85945	0.0006	0.005	3.926	8.12903	0.41631	0.23555	0.17756	0.048	0.013663	0.004775	0.0032034	0.0018392	0.0011911	0.0010586	0.0009532	0.00071383	3.99678
Souš	2023-09-12	0	16.7748	<0.05	<0.03	6.66	213.3	112.2	9.11	23	18.15	0.18		5.829	4.9865	0.3192	0.004	0.5	0.06	3	0.02	1.1	22	0.12415	0	0.003	1.77045	0.12	0.45155	0.48495	0.00255	0.93335	0	0.0023	3.923	8.129	0.296	0.168	0.12438	0.0304	0.00827	0.00257	0.00159	0.000793	0.00044	0.000328	0.000241	5.67e-05	3.3691
Souš	2023-09-12	2.5	17.1959	<0.05	<0.03	6.71	218.5	111.6	9.1	23	17.91	0.13		5.883	4.995	0.3275	0.003	0.5	0	0	0.03	1.1	23	0.1284	0	0.00315	1.81925	0.119	0.45765	0.4911	0.00385	0.94365	5e-05	0.0037	3.9445	8.452	0.294	0.17	0.12639	0.0311	0.00879	0.00279	0.00182	0.000997	0.000513	0.000495	0.000363	0.000258	3.4034
Souš	2023-09-12	5	18.2925	<0.05	<0.03	6.33	248.4	95.9	8.17	25	15.82	0.15		5.848	5.163	0.34045	0.004	0.5	0.01	1	0.01	1	25	0.13465	0	0.00365	1.80935	0.1365	0.45365	0.4957	0.0048	0.94315	5e-05	0.00445	4.0325	7.161	0.324	0.18	0.13433	0.0339	0.00957	0.0033	0.0022	0.00122	0.000767	0.000681	0.000581	0.000407	3.48635
Souš	2023-09-12	7.5	22.5121	<0.05	<0.03	5.74	271.1	60	5.43	26	13.11	0.13		7.1975	6.5875	0.36905	0.002	0.4	0.01	3	0.03	1.2	45	0.23135	0	0.0049	1.77235	0.2666	0.4701	0.48335	0.01535	0.89635	0.0006	0.00585	4.118	7.161	0.478	0.26	0.1956	0.0529	0.0151	0.00509	0.00317	0.00174	0.00103	0.000869	0.000734	0.000412	3.94687
Souš	2023-09-12	10	25.2004	<0.05	<0.03	5.65	276	44.3	4.15	28	11.56	0.1		7.569	6.7145	0.3788	0.003	0.4	0.03	3	0.02	1.1	41	0.29215	0	0.00575	1.6938	0.43985	0.47565	0.4655	0.0297	0.84265	0.00085	0.00595	4.014	8.129	0.48	0.279	0.20955	0.0579	0.0163	0.00543	0.00356	0.002	0.00114	0.000995	0.000881	0.000586	4.15519
Souš	2023-09-12	13	24.2586	<0.05	<0.03	5.65	243.3	33.8	3.23	31	10.74	0.1		7.1265	6.1945	0.43775	0.003	0.5	0.07	0	0.03	1.2	35	0.30585	0	0.00585	1.67815	0.50695	0.4777	0.46185	0.0358	0.8353	0.0009	0.0055	4.002	10.0645	0.437	0.256	0.19161	0.0528	0.0149	0.00519	0.00338	0.00194	0.00108	0.00103	0.000908	0.000704	4.1327
Souš	2023-09-12	14	25.026	<0.05	<0.03	5.67	207.9	23.1	2.22	32	10.54	0.08		7.2265	6.5745	0.43125	0	0.4	0.06	1	0.06	1.3	62	0.30585	0	0.00605	1.66255	0.5741	0.4798	0.45825	0.04195	0.828	0.00105	0.0051	3.9905	10.065	0.48	0.29	0.22057	0.0664	0.0212	0.00844	0.00605	0.0039	0.00271	0.00243	0.00219	0.00165	4.41098
Souš	2023-10-09	0	21.1083	0.0782101	<0.02	6.21	96.1	94.8	8.4	25	13.46	0.12		5.986	5.3375	0.3458	0.002	0.4	0.02	5	0.05	0.9	23	0.1534	0	0.00445	1.7071	0.2527	0.48845	0.48895	0.01125	1.0425	0.00065	0.0016	4.1855	8.12903	0.32629	0.18756	0.14351	0.045406	0.021184	0.014619	0.013448	0.011706	0.011296	0.011009	0.010807	0.010701	3.514
Souš	2023-10-09	2.5	20.9954	0.058057	<0.02	6.28	104.3	93.6	8.3	26	13.44	0.11		6.08	5.6295	0.3596	0.004	0.4	0.03	5	0.1	0.8	23	0.21125	0	0.0046	1.79805	0.2495	0.4912	0.5066	0.0159	1.0607	0.00095	0.0081	4.2095	11.6774	0.31676	0.18759	0.14336	0.045396	0.020731	0.014102	0.012845	0.01114	0.010623	0.010472	0.01009	0.010044	3.33227
Souš	2023-10-09	5	21.0389	0.0700277	<0.02	6.31	111.9	93.1	8.25	27	13.44	0.13		5.9935	5.5985	0.3461	0.001	0.3	0.01	5	0.06	0.8	23	0.1552	0	0.0044	1.71185	0.2485	0.4867	0.4863	0.0119	1.03815	0.0007	0.00555	4.1935	7.16129	0.31538	0.18887	0.14436	0.045423	0.02048	0.013653	0.012417	0.010738	0.010247	0.010064	0.0097885	0.0096993	3.37358
Souš	2023-10-09	7.5	21.1168	0.0513637	<0.02	6.26	126.5	88	7.8	28	13.38	0.11		6.0725	5.6145	0.3549	0.002	0.3	0.02	5	0.06	0.8	18	0.15585	0	0.00445	1.6827	0.2547	0.4831	0.48465	0.01165	1.03115	0.0006	0.0046	4.199	7.16129	0.33026	0.19735	0.15107	0.047757	0.021102	0.013633	0.012225	0.010444	0.0098662	0.0096245	0.0092826	0.009172	3.51501
Souš	2023-10-09	10	22.1769	0.0599067	<0.02	6.01	145.2	65.3	5.84	30	13	0.11		6.169	5.99	0.3679	0.002	0.3	0.01	5	0.07	0.9	33	0.17375	0	0.0052	1.7432	0.33815	0.48755	0.48995	0.0246	1.03645	0.0008	0.00375	4.213	7.80645	0.38487	0.23377	0.18148	0.062274	0.028326	0.018473	0.016296	0.01382	0.012887	0.012507	0.012074	0.011698	3.90267
Souš	2023-10-09	11.5	25.1443	0.120231	<0.02	5.79	155.6	36.2	3.29	32	12.27	0.13		6.7175	6.0725	0.42065	0.001	0.2	0.07	4	0.11	0.9	33	0.2226	0	0.00545	1.6852	0.52865	0.4879	0.4786	0.0293	0.9923	0.00105	0.0042	4.2495	9.74194	0.40802	0.24826	0.19098	0.060615	0.022717	0.01236	0.010196	0.0079131	0.0069566	0.006671	0.0063424	0.0058889	4.08827
Souš	2023-11-14	0	21.277	0.0481842	<0.02	7.36	111.2	107.2	10.95	23	7.1	0.12		6.753	6.6845	0.4831	0.003	0.3	0.1	3	0.04	1.3	39	0.242	0	0.0048	1.71	0.218	0.652	0.477	0.0105	1.0565	0	0.0028	4.149	10.3871	0.44813	0.25379	0.19111	0.050881	0.013777	0.0042963	0.0026875	0.0012116	0.00046825	0.00031328	0.00017023	2.4796e-05	3.79669
Souš	2023-11-14	2.5	20.7149	0.0473925	<0.02	6.65	159.7	104.4	10.67	25	7.09	0.09		6.764	6.5425	0.43985	0.004	0.3	0.24	3	0.03	1.2	36	0.247	0	0.0048	1.735	0.224	0.728	0.475	0.0166	1.0684	0	0.005	4.136	6.83871	0.44896	0.25515	0.19209	0.051507	0.014102	0.0046186	0.0028539	0.0013161	0.00054741	0.00032949	0.00021505	0	3.89989
Souš	2023-11-14	5	21.6385	0.0678811	<0.02	6.57	162.6	104.1	10.65	26	7.05	0.09		6.7305	6.594	0.44565	0.003	0.3	0.18	4	0.05	1.1	38	0.244	0	0.0048	1.705	0.225	0.718	0.468	0.0118	1.0466	0	0.0041	4.16	7.16129	0.45419	0.25919	0.1952	0.052637	0.014558	0.0046387	0.0029082	0.001308	0.00048542	0.00029707	0.0002017	-2.4319e-05	3.93069
Souš	2023-11-14	7.5	21.5178	0.0450371	<0.02	6.52	164.7	104	10.66	28	6.97	0.09		6.8105	6.5925	0.42595	0.003	0.3	0.16	3	0.05	1.1	38	0.245	0	0.0048	1.704	0.222	0.699	0.466	0.0112	1.0424	0	0.004	4.094	12.9677	0.45678	0.26134	0.19689	0.053559	0.01487	0.0047383	0.0029726	0.0013914	0.00054455	0.00037432	0.0002327	1.9073e-06	3.9642
Souš	2023-11-14	10	21.2672	0.0421848	<0.02	6.49	166.7	103.9	10.66	30	6.95	0.1		6.709	6.6515	0.45175	0.003	0.3	0.16	3	0.07	1.2	39	0.244	0	0.0048	1.647	0.224	0.693	0.462	0.0106	1.036	0	0.0028	4.118	5.87097	0.45415	0.25928	0.19565	0.053053	0.014888	0.0047841	0.0029821	0.0014901	0.00066519	0.00050545	0.0003376	0.00018263	3.89807
Souš	2023-11-14	14	21.4074	0.0532458	<0.02	6.44	169.5	103.7	10.63	33	6.95	0.09		6.807	6.456	0.45035	0.005	0.3	0.16	3	0.04	1.1	36	0.244	0	0.0048	1.745	0.224	0.715	0.469	0.0105	1.0392	0	0.0036	4.091	8.12903	0.44019	0.24996	0.18802	0.050199	0.014025	0.0045252	0.0029359	0.0014873	0.00072813	0.00064516	0.00048161	0.0003314	3.87175
Souš	2024-04-09	0	15.6339	<0.04	<0.07	5.84	235.3	119.4	11.75	17	9	0.12	8.76762	6.994	6.676	0.2514	0.09	0.3	0	1	0.03	1	49	0.3304	0.0046	0.00245	1.07345	0.05225	0.3745	0.3441	0.0137	0.47865	0.00085	0.0282	2.8995	5.87097	0.47603	0.26788	0.19762	0.052799	0.01434	0.0041289	0.0025997	0.0011353	0.00047541	0.00032139	0.0003686	1.5259e-05	4.01258
Souš	2024-04-09	2.5	15.7216	0.0537584	<0.07	5.84	237.5	119.8	11.89	17	8.67	0.11	8.69098	7.07	6.768	0.2505	0.013	0.2	0.01	2	0.03	0.9	49	0.33395	0.00215	0.00245	1.0975	0.05135	0.3724	0.34835	0.0152	0.48355	0.00085	0.0394	2.877	12.6452	0.4988	0.27257	0.20178	0.054362	0.014949	0.004272	0.002336	0.00076103	-2.8133e-05	-0.00021601	-0.00039577	-0.0006752	4.02733
Souš	2024-04-09	5	16.2601	<0.04	<0.07	5.78	246.8	117.1	12.22	19	6.62	0.12	8.622	6.983	6.858	0.2759	0.09	0.3	0.02	0	0.02	0.8	48	0.3398	0.00245	0.0025	1.05995	0.0564	0.36695	0.34155	0.0142	0.47235	0.0009	0.04685	2.888	6.83871	0.46173	0.27549	0.20389	0.054744	0.014622	0.003654	0.0020523	0.00038433	-0.00054646	-0.00066471	-0.00075531	-0.0011649	4.01706
Souš	2024-04-09	7.5	16.1944	<0.04	<0.07	5.75	250.7	115.4	12.12	21	6.36	0.11	8.80594	7.057	6.85	0.2929	0.017	0.2	0.01	0	0.04	0.6	49	0.35315	0.0025	0.0026	1.08235	0.0572	0.37695	0.345	0.0144	0.4817	0.0009	0.07965	2.916	11.0323	0.46474	0.27796	0.20586	0.05579	0.015027	0.003983	0.0021491	0.00048256	-0.00028372	-0.00048494	-0.00066757	-0.00098991	4.05781
Souš	2024-04-09	10	16.0989	0.0619597	<0.07	5.74	255.3	113.2	11.91	23	6.31	0.12	8.97454	7.135	6.773	0.2832	0.013	0.3	0	1	0.03	1.1	49	0.3571	0.0036	0.0026	1.06925	0.0599	0.3552	0.34715	0.0145	0.4737	0.0009	0.0468	2.8885	8.12903	0.50148	0.27862	0.20652	0.055991	0.015569	0.0042696	0.0023913	0.00067616	-0.00025082	-0.00041914	-0.00058317	-0.00086403	4.11369
Souš	2024-04-09	14	16.1287	0.0685371	<0.07	5.74	257.9	112.6	11.84	25	6.34	0.13	9.8559	7.111	7.293	0.2773	0.014	0.2	0	0	0.05	0.6	49	0.3271	0.0035	0.00255	1.0648	0.0663	0.37435	0.33775	0.0146	0.45905	0.0008	0.0436	2.8725	18.4516	0.46259	0.27688	0.20502	0.055415	0.014919	0.0039592	0.0022287	0.00056028	-0.00025845	-0.00043631	-0.00065041	-0.0010262	3.79652
Souš	2024-05-14	0	14.5461	<0.08	<0.04	6.2	134	121.6	10.74	10	13.85	0.2	11.01	6.095	5.93	0.2351	0.007	0.3	0.01	3	0.05	1.1	27	0.24995	0	0.00175	1.34445	0.04325	0.45335	0.3782	0.01235	0.76495	5e-05	0.00505	3.168	2.64516	0.4308	0.2285	0.16882	0.045108	0.012926	0.0034046	0.0018797	0.00058126	-0.0001092	-0.00030375	-0.00032282	0	3.85329
Souš	2024-05-14	2.5	14.5389	0.096847	<0.04	6.23	146.6	120.2	10.93	12	12.57	0.2	10.32	6.016	6.129	0.2669	0.009	0.3	0.01	3	0.03	1.2	25	0.2565	0	0.0019	1.439	0.0458	0.37095	0.3884	0.0129	0.7721	0	0.0115	3.123	1.67742	0.43515	0.22898	0.16953	0.044853	0.012595	0.0032029	0.001615	0.00038958	-0.00026083	-0.00043631	-0.00037384	0	3.73601
Souš	2024-05-14	5	14.194	<0.08	<0.04	6.23	156.4	118.9	10.99	15	11.87	0.14	10.36	5.979	5.864	0.2394	0.008	0.3	0.01	2	0.16	0.9	24	0.2687	0.0012	0.00175	1.39465	0.0498	0.59005	0.37425	0.01215	0.7994	0	0.0339	3.2275	1.35484	0.39168	0.22768	0.16875	0.044847	0.012234	0.0030093	0.0015039	0.00026894	-0.00042439	0	0	0	3.88267
Souš	2024-05-14	7.5	14.3117	<0.08	<0.04	6.16	171.3	115.6	11.12	18	10.17	0.16	10.36	5.819	6.209	0.2497	0.009	0.3	0.02	2	0.03	0.9	24	0.2804	0.00055	0.00195	1.4631	0.0513	0.4892	0.38465	0.0126	0.77955	0.0001	0.0146	3.3025	0.709677	0.39225	0.22786	0.16925	0.04504	0.012332	0.0030837	0.0017014	0.00048351	-0.00015974	-0.00022602	-0.00025797	-0.00047016	3.66983
Souš	2024-05-14	10	15.1053	<0.08	<0.04	5.94	191.3	106.6	10.74	22	8.21	0.16	11.17	6.346	6.513	0.3127	0.014	0.3	0.03	1	0.05	0.7	25	0.2745	5e-05	0.0017	1.30225	0.05665	0.45095	0.35345	0.0136	0.7196	0.0001	0.0076	3.071	3.6129	0.41577	0.24073	0.1785	0.047303	0.012687	0.0030684	0.0014868	0.00032854	-0.00038052	-0.00046349	-0.0004487	0	3.69615
Souš	2024-05-14	14	15.2684	0.111623	<0.04	5.87	199.4	104	10.53	25	7.99	0.12	11.05	6.22	6.225	0.2751	0.012	0.3	0.02	1	0.06	1.3	27	0.30205	0	0.0018	1.24865	0.06455	0.42495	0.34135	0.0146	0.67645	0.00015	0.0105	3.074	4.25806	0.41766	0.24295	0.18013	0.04796	0.012696	0.0031452	0.0013824	0.00023127	-0.00041437	0	0	0	3.90281
Inlet Cerna Desna	2024-05-14		9.2966	0.139209	<0.04	6.71	163	125.3	11.92	25	10.4	0.2	6.22	2.421	3.443	0.2674	0.014	0.4	0.02	4	0.06	1	7	0.0797	0	0.0006	2.1315	0.02855	2.8672	0.431	0.00095	1.33665	0	0.01815	6.104	0	0.23042	0.081465	0.062092	0.01782	0.0049119	0.00083923	0.00012827	-0.00046539	0	0	0	0	2.36611
Inlet Bílá Desná (upstream connection to Souš)	2024-05-15		6.70163	<0.08	<0.04					30	10
Inlet Bílá Desná (downstream connection to Souš)	2024-05-15		6.62398	<0.08	<0.04					31.9	9.3
[truncated: 12 more columns]

## Sheet: Ge specific method
Germanium speciation data (IAC) reanalyzed by Ge specific method on 17-Jan-2025
Values below LOD (<0.02) are in Italics
	Sampling date	Depth (m)	iGe (ng/L)	MGe (ng/L)	DMGe (ng/L)
Vrchlice	2023-05-09	5	2.49346	0.34561	0.0857985
Vrchlice	2023-06-06	5	1.592	0.443775	0.0887116
Vrchlice	2023-07-11	5	1.51646	0.432721	0.0934283
Vrchlice	2023-08-15	5	1.84116	0.352757	0.0910707
Vrchlice	2023-09-12	5	1.94047	0.373278	0.09419
Vrchlice	2023-10-09	5	2.45359	0.391281	0.10463
Vrchlice	2023-11-14	5	2.92489	0.360992	0.0967844
Vrchlice	2023-12-12	5	3.27979	0.359686	0.0936632
Vrchlice	2024-02-06	5	5.4542	0.327132	0.0805685
Vrchlice	2024-03-12	5	4.23741	0.31765	0.0774814
Vrchlice	2024-04-09	5	2.84062	0.31805	0.0824563
Vrchlice	2024-05-14	5	0.764134	0.319331	0.0751554
Vrchlice river- inlet Malešov bridge	2024-05-14	0	5.09361	0.424534	0.106786
Souš	2024-05-14	2.5	15.4973	0.045347	<0.02
Inlet Cerna Desna	2024-05-15	0	10.0742	0.0403639	<0.02
Inlet Bílá Desná (upstream connection to Souš)	2024-05-15	0	6.59174	0.0509055	<0.02

## Sheet: Vrchlice phytoplankton data
Vrchlice; Profile 10; integrated samples		Data provided by Povodí Labe, a.s.
	Counts:									Biomass:
Date of collection:	2023-02-27	2023-04-17	2023-06-26	2023-08-28	2023-10-16	2024-02-26	2024-04-15	2024-06-10		2023-02-27	2023-04-17	2023-06-26	2023-08-28	2023-10-16	2024-02-26	2024-04-15	2024-06-10
	cell/ml	cell/ml	cell/ml	cell/ml	cell/ml	cell/ml	cell/ml	cell/ml		mg/l	mg/l	mg/l	mg/l	mg/l	mg/l	mg/l	mg/l
Achnanthidium sp.							10									0.001655
Ankyra judayi agg.								20									0.001676
Ankyra lanceolata							80									0.006434
Aphanizomenon gracile
Aphanizomenon sp.
Aphanocapsa sp.	1760		328000	265600	32000		1600	395200		0.0009215		0.1252	0.1391	0.01676		0.0008378	0.1059
Aphanothece sp.			216000	24000	4800			100800				0.1099	0.01634	0.00377			0.03103
Asterionella formosa,H	170	170	15			20				0.05519	0.05065	0.0003056			0.004329
Aulacoseira sp.							50									0.01347
Aulacoseira subarctica						60									0.0508
Botryococcus braunii
Carteria sp.								5									0.004424
Ceratium furcoides
Ceratium hirundinella,M			5					25				0.1575					1.469
Closterium acutum					10									0.004712
Coelastrum microporum			400									0.04524
Coelastrum reticulatum			30	140	1080							0.003393	0.02514	0.1221
Colacium sp.		10					10				0.03485					0.02036
Cosmarium sp.			10					5				0.01474					0.005864
Cryptomonas curvata	5									0.03167
Cryptomonas erosa	240	140	50	60		440	50	50		0.3267	0.1759	0.06283	0.1327		0.5068	0.06545	0.07603
Cryptomonas marssonii		60	20	70		60	30	10			0.04222	0.01273	0.04457		0.04835	0.02011	0.004875
Cryptomonas reflexa	100	80	30	20	10	200	5	30		0.2874	0.1911	0.08313	0.04778	0.01414	0.6833	0.01056	0.08621
Cryptomonas sp.
Cuspidothrix issatschenkoi					100									0.01272
Cyanobacteria coccalia	1440	1120	372000	159200	53280	1200	240	640		0.000754	0.0005864	0.1948	0.08336	0.0279	0.0006283	0.0001257	0.0003351
Cyanocatena sp.			24000									0.01634
Cyanodictyon sp.			44000					8000				0.02426					0.003217
Cyclostephanos dubius					240									0.03695
Cyclotella balatonis	5	180	30	30			140			0.01454	0.5611	0.06128	0.02787			0.57
Cyclotella pseudostelligera		20				80	160				0.000754				0.002011	0.006032
Dictyosphaerium pulchellum	1760					2880	2720			0.02488					0.04072	0.03845
Dictyosphaerium tetrachotomum,B
Didymocystis sp.			320				80					0.004691				0.0008378
Dinobryon divergens		30						10			0.006927						0.001508
Dolichospermum compactum
Dolichospermum flos-aquae
Dolichospermum lemmermannii
Dolichospermum planctonicum
Elakatothrix genevensis				10	10		20						0.0004608	0.001461		0.002681
Euglena sp.	5									0.01362
Eutetramorus sp.			320	110	40			240				0.05747	0.007199	0.002618			0.01571
Fragilaria acus agg.		180				10					0.1404				0.0225
Fragilaria tenera	30									0.009167
Gomphosphaeria sp.			320									0.0009684
Chlamydomonas sp.	60			250		180	40	160		0.0229			0.07584		0.1629	0.01072	0.04289
Chlorobionta coccalia		160	320	120	640	480	360	720			0.01047	0.02094	0.004021	0.02145	0.01608	0.005089	0.04712
Chloromonas sp.	80					80	80			0.009048					0.009425	0.003142
Chromulina sp.						320									0.004524
Chroococcus sp.				20									0.004418
Chroomonas acuta				10		80							0.001309		0.01357
Chrysococcus biporus	80	80					40			0.009048	0.009048					0.004524
Chrysococcus rufescens	240					80	80			0.003393					0.001131	0.001131
Chrysococcus sp.	80									0.01437
Chrysochromulina sp.	160	2320	1600	560			240	720		0.003016	0.04373	0.03016	0.01056			0.005655	0.01357
Chrysophyceae monadoideae	320	320	80	80	80	480	240	240		0.004524	0.004524	0.001131	0.002681	0.001131	0.006786	0.003393	0.003393
Koliella longiseta	60	20				10		30		0.002262	0.0006786				0.002178		0.0007665
Lagerheimia genevensis	80									0.001885
Mallomonas akrokomos	20						10	40		0.005278						0.001592	0.005697
Mallomonas sp.						20	10								0.01047	0.008378
Merismopedia minutissima			50200					30720				0.009016					0.005517
Micractinium sp.
Microcystis aeruginosa				580	320			320					0.03796	0.02094			0.03619
Microcystis ichthyoblabe				80	1280			240					0.001131	0.0181			0.003393
Monoraphidium contortum	40	1200					40			0.0007707	0.01307					0.0005194
Nephrocytium sp.			30	100	410							0.01244	0.01759	0.1234
Nephrodiella sp.					160									0.04926
Nitzschia acicularis	20									0.004074
Nitzschia graciliformis	10									0.004011
Nitzschia sp.	10									0.003947
Ochromonas sp.		320		40			120	80			0.06032		0.002346			0.0181	0.01206
Oocystis marssonii				10	40		10	60					0.002309	0.009236		0.003016	0.01385
Oocystis parva			80		320							0.01026		0.03284
Pediastrum duplex,B
Pediastrum tetras
Peridinium sp.	5					15				0.03534					0.1916
Plagioselmis lacustris	160	480	120	40	400	2080	80	960		0.07506	0.285	0.05228	0.02375	0.1743	0.4705	0.03753	0.4504
Planktolyngbya sp.
Planktosphaeria gelatinosa			20	5				420				0.003592	0.00134				0.02749
Planktothrix agardhii
Pseudanabaena mucicola
Pseudanabaena sp.		1160			150						0.005598			0.001718
Rhodomonas minuta	240	640		80	80	800	720	400		0.01608	0.0754		0.009425	0.005362	0.06032	0.08482	0.02681
Scenedesmus alternans								40									0.0006702
Scenedesmus brasiliensis,B			40									0.0005864
Scenedesmus communis			80									0.001005
Scenedesmus linearis								80									0.00377
Snowella lacustris				320	12800								0.0004343	0.0134
Snowella litoralis			4800									0.02328
Sphaerocystis schroeteri			20		20			40				0.007634		0.007634			0.02094
Staurastrum pingue					10									0.1404
Staurastrum planctonicum				5									0.04224
Staurastrum tetracerum
Stenocalyx sp.		80					80				0.001508					0.003351
Stephanodiscus minutulus	80					10				0.006786					0.000589
Synura sp.	40			10		560				0.00821			0.003016		0.3903
Tetraedron minimum,K				10			10	5					0.00245			0.00256	0.00128
Tetraselmis subcordiformis	10									0.001508
Tetrastrum elegans	320									0.01072
Trachelomonas hispida	5	5				10				0.01229	0.007372				0.004189
Trachelomonas planctonica,O					5									0.008836
Trachelomonas verrucosa							10									0.005236
Trachelomonas volvocina		10				20					0.0115				0.01394
Trachelomonas volvocinopsis								30									0.02091
Treubaria sp.	15680									0.1443
Uroglena sp.			160									0.02413
Willea sp.			280	120				40				0.05278	0.02488				0.006786
Woronichinia naegeliana			720	720	50410		280	7850				0.01019	0.00966	0.6081		0.003665	0.07432
TOTAL:	23315	8785	1044100	452400	158695	10175	7645	548230		1.16366	1.73271	1.2342	0.80188	1.47924	2.71794	0.959425	2.6236

## Sheet:  Souš phytoplankton data
Souš; Profile 3; integrated samples		Data provided by Povodí Labe, a.s.
	Counts:							Biomass:
Date of collection:	2023-04-24	2023-06-05	2023-08-21	2023-10-23	2024-04-22	2024-06-17		2023-04-24	2023-06-05	2023-08-21	2023-10-23	2024-04-22	2024-06-17
	cell/ml	cell/ml	cell/ml	cell/ml	cell/ml	cell/ml		mg/l	mg/l	mg/l	mg/l	mg/l	mg/l
Achnanthidium sp.						5							0.0002188
Aphanocapsa sp.				3200							0.001221
Asterionella formosa,H						8							0.001706
Binuclearia tectorum						5							0.0004189
Botryococcus braunii			8							0.001206
Brachysira sp.
Closterium kuetzingii
Crucigeniella rectangularis				112							0.0095
Cryptomonas erosa		8							0.01089
Cryptomonas marssonii	10	30				35		0.005697	0.01462				0.01527
Cryptomonas reflexa	5							0.01488
Cryptomonas sp.			5							0.003605
Cyanobacteria coccalia	200	520	400	8560	280	180		0.0001047	0.002178	0.0007069	0.004482	0.0001466	9.425e-05
Cyanodictyon sp.				3200							0.001501
Dinobryon cylindricum					190	300						0.137	0.07697
Dinobryon sp.			2		30	25				0.0004618		0.01608	0.02876
Encyonema sp.
Eunotia sp.	5							0.003142
Eutetramorus sp.				20							0.002262
Gonyostomum semen		6	1	2					0.1676	0.02827	0.03664
Gymnodinium sp.				4							0.1239
Heminidium sp.	5	4	8	15	2	4		0.09408	0.06863	0.2681	0.7645	0.09651	0.1773
Chlamydomonas sp.
Chlorobionta coccalia		60	480	240	40	20			0.003927	0.006786	0.008042	0.0005655	0.0006702
Chloromonas minima	40		5			60		0.001696		0.0003351			0.003519
Chromulina sp.	3040	680	800	160	440	60		0.05216	0.009613	0.01131	0.002262	0.01474	0.0008482
Chrysidalis sp.			160							0.006283
Chrysococcus rufescens						40							0.0005655
Chrysococcus sp.
Chrysochromulina sp.
Chrysophyceae monadoideae	160	60	160	240	1080	100		0.0006702	0.0008482	0.002262	0.003393	0.01527	0.001414
Katodinium sp.	45		40	2				0.01659		0.01178	0.0004524
Mallomonas sp.
Merismopedia punctata						10560							0.004031
Merismopedia sp.		800	271360	1200					0.0004189	0.1421	0.002574
Ochromonas sp.			5							0.0006597
Oocystis lacustris agg.						15							0.003848
Oocystis rhomboidea			40	4		10				0.004974	0.0009236		0.001178
Peridinium sp.		5	4		14				0.03294	0.01759		0.11
Phacus pyrum,B						5							0.002969
Stenopterobia sp.				2	2						0.002073	0.001131
Synechococcus sp.						140							0.001419
Tabellaria flocculosa agg.						8							0.007917
Uroglena sp.	8640	60				60		0.7917	0.01232				0.007069
Xanthidium sp.					2							0.006355
TOTAL	12150	2233	273478	16961	2080	11640		0.98072	0.323985	0.506429	0.963726	0.397798	0.336186
